# Supplementary material for: Towards a comprehensive understanding of malathion degradation: comparison of degradation reactions under alkaline and radical conditions
Source: Royal Society of Chemistry journal article supplement (doi:10.1039/d2em00050d), 2022-01-01
Supplement: d2em00050d2.pdf [file d2em00050d2.pdf]

# Towards a Comprehensive Understanding of Malathion Degradation: Comparison of Degradation Reactions under Alkaline and Radical Conditions

*Robert W. Lamb<sup>1,2</sup>, Harley McAlexander<sup>3</sup>, Christa M. Woodley<sup>3</sup>, and Manoj K. Shukla<sup>3\*</sup>*

<sup>1</sup>Oak Ridge Institute for Science and Education, Oak Ridge, TN, USA

<sup>2</sup>Current affiliation: Simetri Inc., 7005 University Blvd, Winter Park, FL 32792, USA

<sup>3</sup>US Army Engineer Research and Development Center, Environmental Laboratory, 3909 Halls  
Ferry Road, Vicksburg, MS 39180, USA

## Supporting Information

### **Table of Contents**

|                                   |    |
|-----------------------------------|----|
| Additional Reaction Pathways..... | 2  |
| Energy Tables .....               | 5  |
| XYZ Coordinates .....             | 11 |

## Additional Reaction Pathways

With  $\text{OH}^-$ , the free energy of activation association to the  $\beta$  ester position, **TS13**, is more endergonic than association to the  $\alpha$  position in **TS9** (8.7 vs 5.3 kcal mol<sup>-1</sup>) indicating the reaction at the  $\alpha$  site will be kinetically favored. However, reaction at the  $\beta$  site is still quite feasible and could be expected to occur to some degree. Subsequent dissociation of the OMe group, **TS14**, has a slightly lower free energy of activation indicating that the dissociation step will likely occur should  $\text{OH}^-$  bind. Similarly, initial binding with  $\text{OH}\cdot$  is endergonic, **TS13** (14.5 kcal mol<sup>-1</sup>), while the subsequent dissociation of OMe, **TS14**, is slightly lower in energy (12.0 kcal mol<sup>-1</sup>) indicating facile degradation upon association of  $\text{OH}\cdot$  to the  $\beta$  site. Although these energies are still feasible at room temperature, degradation with  $\text{OH}\cdot$  is notably higher in energy, and therefore slower, than degradation by  $\text{OH}^-$ . Interestingly, following dissociation of the OMe group as methanol, it is lower in energy for this structure to reorganize to the carboxylic acid form with a proximal  $\text{OMe}\cdot$  radical, **28**. Although, the carboxylic acid will likely become deprotonated once the  $\text{OMe}\cdot$  migrates away in bulk solution.

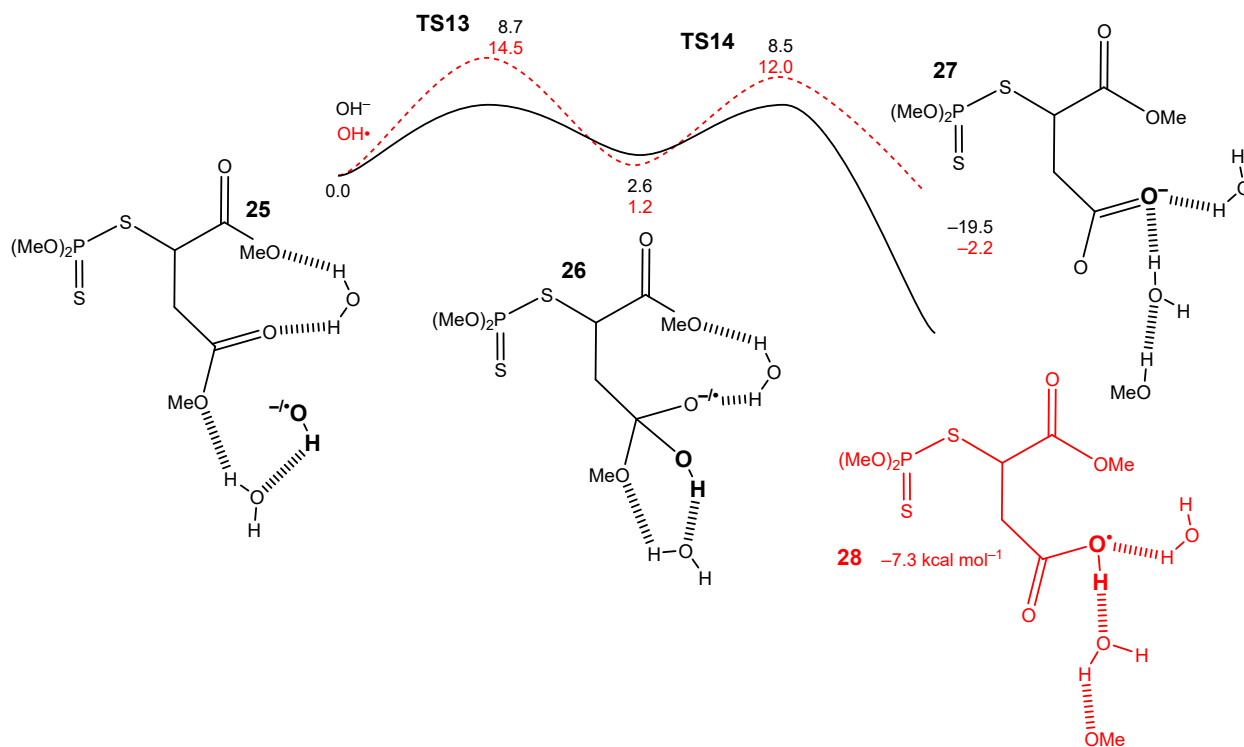

Figure S1. Initial  $\beta$ -ester degradation at the M06-2X/aug-cc-pVTZ//M06-2X/6-31G(d,p) level of theory in bulk water. Non-bolded numbers indicate relative free energies in kcal mol<sup>-1</sup>. Bolded numbers denote the compound numbers as local minimum (standard) or transition state (leading “TS”) geometries. Atoms corresponding to the hydroxide ion or hydroxyl radical are bolded and enlarged throughout the reaction. The position of the negative charge or radical electron are also noted when localized to a single atom.

Following degradation of the  $\beta$  position, and exchange of the MeOH byproduct for an additional OH<sup>-</sup> or OH•, the  $\alpha$  position can then be degraded in a similar way. Degradation by OH<sup>-</sup> remains quite facile with the initial association **TS15** being only slightly higher in energy (8.9 kcal mol<sup>-1</sup>) than association at the  $\alpha$  position in **TS13** (8.7 kcal mol<sup>-1</sup>). Similarly, initial association of the OH• to **29** is slightly higher in energy than the previous association to **25** (15.6 vs 14.5 kcal mol<sup>-1</sup>) while

the subsequent dissociation of OMe• is lower in energy. Again, the lower energy structure **32** is with the  $\alpha$  carboxyl group retaining a proton as a carboxylic acid and a proximal OMe• radical.

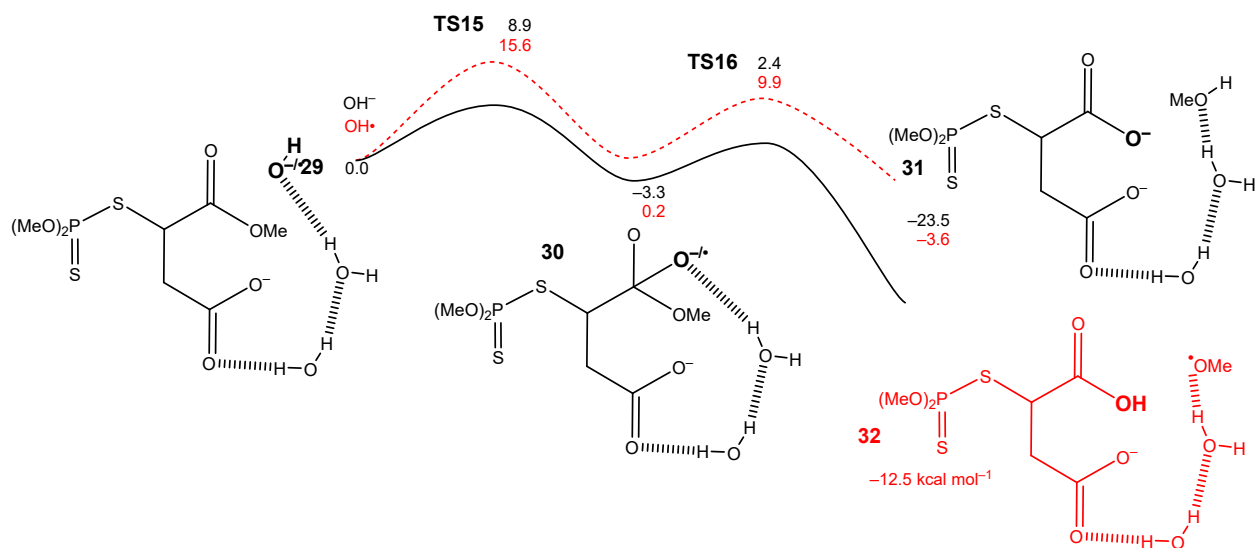

Figure S2.  $\alpha$ -ester degradation following  $\beta$ -ester hydrolysis at the M06-2X/aug-cc-pVTZ//M06-2X/6-31G(d,p) level of theory in bulk water. Non-bolded numbers indicate relative free energies in kcal mol<sup>-1</sup>. Bolded numbers denote the compound numbers as local minimum (standard) or transition state (leading “TS”) geometries. Atoms corresponding to the hydroxide ion or hydroxyl radical are bolded and enlarged throughout the reaction. The position of the negative charge or radical electron are also noted when localized to a single atom.

## Energy Tables

Table S1: Relative free energies in kcal mol<sup>-1</sup>. Free energies for single-point computations were obtained by applying the thermodynamic corrections from M06-2X/6-31G(d,p) to the SCF energies from computations with aug-cc-pVTZ.

|             | M06-2X/6-31G(d,p) | M06-2X/aug-cc-pVTZ//<br>M06-2X/6-31G(d,p) | MP2/aug-cc-pVTZ//<br>M06-2X/6-31G(d,p) |
|-------------|-------------------|-------------------------------------------|----------------------------------------|
| <b>1</b>    | 0.0               | 0.0                                       | 0.0                                    |
| <b>TS1</b>  | 6.9               | 4.6                                       | 16.0                                   |
| <b>3</b>    | -19.1             | -22.9                                     | -10.1                                  |
| <b>4</b>    | 0.0               | 0.0                                       | 0.0                                    |
| <b>TS2</b>  | 16.6              | 17.8                                      | 31.1                                   |
| <b>5</b>    | 3.0               | 5.4                                       | 11.2                                   |
| <b>TS3</b>  | 6.7               | 15.7                                      | 32.9                                   |
| <b>6</b>    | -14.9             | -13.7                                     | -6.2                                   |
| <b>7</b>    | -2.9              | -1.7                                      | 3.9                                    |
| <b>8</b>    | 0.0               | 0.0                                       | 0.0                                    |
| <b>TS4</b>  | 18.4              | 20.3                                      | 34.6                                   |
| <b>9</b>    | 7.4               | 15.6                                      | 29.6                                   |
| <b>TS5</b>  | 13.7              | 21.4                                      | 50.9                                   |
| <b>10</b>   | -10.6             | -8.5                                      | -4.6                                   |
| <b>11</b>   | 1.1               | 2.1                                       | 2.7                                    |
| <b>12</b>   | 0.0               | 0.0                                       | 0.0                                    |
| <b>TS6</b>  | 5.3               | 5.3                                       | 12.2                                   |
| <b>13</b>   | -28.3             | -27.8                                     | -13.6                                  |
| <b>TS7</b>  | -1.7              | 2.5                                       | 18.0                                   |
| <b>14</b>   | -8.4              | -2.3                                      | 0.6                                    |
| <b>15</b>   | -5.0              | -0.7                                      | 1.4                                    |
| <b>TS8</b>  | -0.1              | 4.6                                       | 20.1                                   |
| <b>16</b>   | -25.2             | -21.7                                     | 3.3                                    |
| <b>18</b>   | 0.0               | 0.0                                       | 0.0                                    |
| <b>TS9</b>  | 16.9              | 17.5                                      | 29.7                                   |
| <b>19</b>   | -1.2              | 2.3                                       | 70.7                                   |
| <b>TS10</b> | 9.5               | 11.5                                      | 91.2                                   |
| <b>20</b>   | 5.2               | -1.6                                      | 12.9                                   |
| <b>21</b>   | -10.6             | -9.9                                      | -7.4                                   |

Table S1 cont.

|             | M06-2X/6-31G(d,p) | M06-2X/aug-cc-pVTZ//<br>M06-2X/6-31G(d,p) | MP2/aug-cc-pVTZ//<br>M06-2X/6-31G(d,p) |
|-------------|-------------------|-------------------------------------------|----------------------------------------|
| <b>22</b>   | 0.0               | 0.0                                       | 0.0                                    |
| <b>TS11</b> | 16.7              | 17.8                                      | 29.9                                   |
| <b>23</b>   | -0.7              | 2.1                                       | 5.4                                    |
| <b>TS12</b> | 22.5              | 30.6                                      | 65.0                                   |
| <b>24</b>   | -4.5              | -1.3                                      | 12.9                                   |
| <b>25</b>   | -33.8             | 0.0                                       | 0.0                                    |
| <b>TS13</b> | -20.2             | 14.5                                      | 27.3                                   |
| <b>26</b>   | -35.0             | 1.2                                       | 4.9                                    |
| <b>TS14</b> | -23.4             | 12.0                                      | 28.7                                   |
| <b>27</b>   | -33.0             | -2.2                                      | 27.6                                   |
| <b>28</b>   | -41.9             | -7.3                                      | -4.6                                   |
| <b>29</b>   | 0.0               | 0.0                                       | 0.0                                    |
| <b>TS15</b> | 13.0              | 15.6                                      | 25.4                                   |
| <b>30</b>   | -4.8              | 0.2                                       | 10.7                                   |
| <b>TS16</b> | 5.9               | 9.9                                       | 32.2                                   |
| <b>31</b>   | -4.0              | -3.6                                      | 45.4                                   |
| <b>32</b>   | -14.8             | -12.5                                     | -8.6                                   |
| <b>33</b>   | -9.7              | 0.0                                       | 0.0                                    |
| <b>TS17</b> | 7.7               | 15.6                                      | 43.3                                   |
| <b>37</b>   | -16.9             | -6.6                                      | 2.9                                    |
| <b>38</b>   | -5.3              | 0.0                                       | 0.0                                    |
| <b>TS21</b> | 14.6              | 19.7                                      | 51.9                                   |
| <b>39</b>   | -50.6             | -48.4                                     | -39.1                                  |
| <b>41</b>   | 0.0               | 0.0                                       | 0.0                                    |
| <b>TS22</b> | 22.2              | 22.9                                      | 87.3                                   |
| <b>42</b>   | -0.9              | 1.4                                       | 48.9                                   |
| <b>TS23</b> | 8.4               | 9.0                                       | 71.0                                   |
| <b>43</b>   | -0.4              | -5.6                                      | 19.6                                   |

Table S1 cont.

|             | <b>M06-2X/6-31G(d,p)</b> | <b>M06-2X/aug-cc-pVTZ//<br/>M06-2X/6-31G(d,p)</b> | <b>MP2/aug-cc-pVTZ//<br/>M06-2X/6-31G(d,p)</b> |
|-------------|--------------------------|---------------------------------------------------|------------------------------------------------|
| <b>44</b>   | 8.8                      | 0.0                                               | 0.0                                            |
| <b>TS24</b> | 24.7                     | 16.0                                              | 17.0                                           |
| <b>45</b>   | 11.2                     | 5.5                                               | 25.4                                           |
| <b>TS25</b> | 13.6                     | 7.9                                               | -28.5                                          |
| <b>46</b>   | 1.0                      | -6.9                                              | -34.2                                          |
| <b>47</b>   | -7.4                     | -13.9                                             | -67.8                                          |

Table S2: Absolute electronic and free energies in hartrees. Free energies for single-point computations were obtained by applying the thermodynamic corrections from M06-2X/6-31G(d,p) to the SCF energies from computations with aug-cc-pVTZ.

|             | M06-2X/6-31G(d,p) | M06-2X/6-31G(d,p) | M06-2X/aug-cc-pVTZ//<br>M06-2X/6-31G(d,p) | MP2/aug-cc-pVTZ//<br>M06-2X/6-31G(d,p) |
|-------------|-------------------|-------------------|-------------------------------------------|----------------------------------------|
|             | E                 | G                 | E                                         | E                                      |
| <b>1</b>    | -2131.16994       | -2130.92208       | -2131.71738                               | -2124.65520                            |
| <b>TS1</b>  | -2131.15574       | -2130.91103       | -2131.70691                               | -2124.62660                            |
| <b>3</b>    | -2131.20043       | -2130.95246       | -2131.75391                               | -2124.67135                            |
| <b>4</b>    | -762.65826        | -762.50638        | -762.98748                                | -759.09097                             |
| <b>TS2</b>  | -762.63421        | -762.47996        | -762.96152                                | -759.04373                             |
| <b>5</b>    | -762.65883        | -762.50153        | -762.98421                                | -759.07849                             |
| <b>TS3</b>  | -762.64558        | -762.49066        | -762.96152                                | -759.04163                             |
| <b>6</b>    | -762.67574        | -762.52511        | -763.00408                                | -759.09957                             |
| <b>7</b>    | -762.65834        | -762.50594        | -762.98683                                | -759.08525                             |
| <b>8</b>    | -722.89991        | -722.78783        | -723.23893                                | -719.58951                             |
| <b>TS4</b>  | -722.87343        | -722.75855        | -723.20937                                | -719.53712                             |
| <b>9</b>    | -722.89396        | -722.77603        | -723.21997                                | -719.54817                             |
| <b>TS5</b>  | -722.88440        | -722.76597        | -723.21115                                | -719.51479                             |
| <b>10</b>   | -722.91731        | -722.80477        | -723.25286                                | -719.59722                             |
| <b>11</b>   | -722.89591        | -722.78614        | -723.23329                                | -719.58296                             |
| <b>12</b>   | -683.15674        | -683.08032        | -683.50138                                | -680.09213                             |
| <b>TS6</b>  | -683.15040        | -683.07186        | -683.49500                                | -680.07482                             |
| <b>13</b>   | -683.20242        | -683.12544        | -683.54623                                | -680.11430                             |
| <b>TS7</b>  | -683.16076        | -683.08305        | -683.49864                                | -680.06479                             |
| <b>14</b>   | -683.17641        | -683.09366        | -683.51142                                | -680.09746                             |
| <b>15</b>   | -683.17017        | -683.08825        | -683.50805                                | -680.09539                             |
| <b>TS8</b>  | -683.15542        | -683.08043        | -683.49263                                | -680.05865                             |
| <b>16</b>   | -683.20113        | -683.12045        | -683.54018                                | -680.09109                             |
| <b>18</b>   | -2131.16928       | -2130.91900       | -2131.71586                               | -2124.65539                            |
| <b>TS9</b>  | -2131.14180       | -2130.89204       | -2131.68751                               | -2124.60757                            |
| <b>19</b>   | -2131.17568       | -2130.92093       | -2131.71661                               | -2124.54724                            |
| <b>TS10</b> | -2131.15593       | -2130.90391       | -2131.69932                               | -2124.51177                            |
| <b>20</b>   | -2131.16082       | -2130.91079       | -2131.71817                               | -2124.63458                            |
| <b>21</b>   | -2131.18148       | -2130.93591       | -2131.72695                               | -2124.66239                            |



Table S2 cont.

|             | M06-2X/6-31G(d,p) | M06-2X/6-31G(d,p) | M06-2X/aug-cc-pVTZ//<br>M06-2X/6-31G(d,p) | MP2/aug-cc-pVTZ//<br>M06-2X/6-31G(d,p) |
|-------------|-------------------|-------------------|-------------------------------------------|----------------------------------------|
|             | E                 | G                 | E                                         | E                                      |
| <b>22</b>   | -2091.42178       | -2091.21016       | -2091.97325                               | -2085.15636                            |
| <b>TS11</b> | -2091.39520       | -2091.18359       | -2091.94492                               | -2085.10864                            |
| <b>23</b>   | -2091.42618       | -2091.21123       | -2091.97326                               | -2085.15112                            |
| <b>TS12</b> | -2091.38449       | -2091.17429       | -2091.92305                               | -2085.05129                            |
| <b>24</b>   | -2091.42620       | -2091.21738       | -2091.97250                               | -2085.13295                            |
| <b>25</b>   | -2131.16655       | -2130.91700       | -2131.71444                               | -2124.65388                            |
| <b>TS13</b> | -2131.14543       | -2130.89522       | -2131.69202                               | -2124.61097                            |
| <b>26</b>   | -2131.17045       | -2130.91876       | -2131.71469                               | -2124.64824                            |
| <b>TS14</b> | -2131.15136       | -2130.90043       | -2131.69670                               | -2124.60948                            |
| <b>27</b>   | -2131.16545       | -2130.91572       | -2131.71815                               | -2124.61002                            |
| <b>28</b>   | -2131.17559       | -2130.92988       | -2131.72227                               | -2124.65737                            |
| <b>29</b>   | -2091.42582       | -2091.21299       | -2091.97418                               | -2085.14957                            |
| <b>TS15</b> | -2091.40737       | -2091.19222       | -2091.95171                               | -2085.11139                            |
| <b>30</b>   | -2091.43794       | -2091.22069       | -2091.97826                               | -2085.13686                            |
| <b>TS16</b> | -2091.42047       | -2091.20360       | -2091.96237                               | -2085.10225                            |
| <b>31</b>   | -2091.42936       | -2091.21938       | -2091.97706                               | -2085.07436                            |
| <b>32</b>   | -2091.45003       | -2091.23663       | -2091.99470                               | -2085.16386                            |
| <b>33</b>   | -2051.66267       | -2051.49163       | -2052.22280                               | -2045.64558                            |
| <b>TS17</b> | -2051.63613       | -2051.46392       | -2052.19909                               | -2045.57766                            |
| <b>37</b>   | -2051.66960       | -2051.50308       | -2052.22885                               | -2045.63644                            |
| <b>38</b>   | -2131.16692       | -2130.91897       | -2131.71586                               | -2124.65725                            |
| <b>TS21</b> | -2131.13855       | -2130.88718       | -2131.68785                               | -2124.57795                            |
| <b>39</b>   | -2131.23865       | -2130.99110       | -2131.79257                               | -2124.71911                            |
| <b>41</b>   | -1162.04628       | -1161.86773       | -1162.41092                               | -1157.81576                            |
| <b>TS22</b> | -1162.01019       | -1161.83233       | -1162.37380                               | -1157.67593                            |
| <b>42</b>   | -1162.05064       | -1161.86915       | -1162.41156                               | -1157.74082                            |
| <b>TS23</b> | -1162.03070       | -1161.85437       | -1162.39434                               | -1157.70036                            |
| <b>43</b>   | -1162.04762       | -1161.86845       | -1162.42044                               | -1157.78509                            |

Table S2 cont.

|             | <b>M06-2X/6-31G(d,p)</b> | <b>M06-2X/6-31G(d,p)</b> | <b>M06-2X/aug-cc-pVTZ//<br/>M06-2X/6-31G(d,p)</b> | <b>MP2/aug-cc-pVTZ//<br/>M06-2X/6-31G(d,p)</b> |
|-------------|--------------------------|--------------------------|---------------------------------------------------|------------------------------------------------|
|             | <b>E</b>                 | <b>G</b>                 | <b>E</b>                                          | <b>E</b>                                       |
| <b>44</b>   | -1122.28883              | -1122.15306              | -1122.65942                                       | -1118.21667                                    |
| <b>TS24</b> | -1122.26476              | -1122.12773              | -1122.63520                                       | -1118.19089                                    |
| <b>45</b>   | -1122.29111              | -1122.14927              | -1122.65679                                       | -1118.18233                                    |
| <b>TS25</b> | -1122.28567              | -1122.14534              | -1122.65132                                       | -1118.26667                                    |
| <b>46</b>   | -1122.29972              | -1122.16551              | -1122.66879                                       | -1118.26966                                    |
| <b>47</b>   | -1122.31335              | -1122.17890              | -1122.68023                                       | -1118.32334                                    |

## XYZ Coordinates

```
1
P -2.154902 -0.574826 0.383624
O -2.251907 -2.166977 0.335044
O -3.587038 -0.169901 -0.217599
C -2.795664 -2.838185 -0.822222
H -3.850993 -2.588493 -0.928558
H -2.233453 -2.563018 -1.716890
H -2.668063 -3.901678 -0.631697
C -3.955308 1.220298 -0.265764
H -3.179614 1.801946 -0.771870
H -4.885991 1.267521 -0.826925
H -4.102527 1.596914 0.748234
S -1.727638 0.089607 2.148613
S -0.886558 -0.025991 -1.223201
C 0.536056 0.751997 -0.371904
C 0.474895 2.260862 -0.545913
O -0.618869 2.774539 0.013945
C -0.767081 4.194901 -0.108777
C 1.841100 0.179900 -0.899531
C 2.954983 0.447809 0.081303
O 4.062500 -0.240868 -0.240518
C 5.189226 -0.036482 0.626978
O 1.317633 2.913365 -1.114869
O 2.883690 1.179181 1.039122
H 0.438512 0.523200 0.692607
H -1.704554 4.436963 0.386374
H 0.067489 4.702782 0.376798
H -0.803340 4.478986 -1.161610
H 1.752795 -0.898218 -1.038291
H 2.112038 0.626341 -1.860921
H 5.991176 -0.645592 0.217136
H 5.468787 1.017460 0.631262
H 4.942454 -0.353909 1.641012
O 0.269024 -2.876978 -1.282893
H 0.203221 -2.558104 -0.344716
O 2.982821 -2.961646 -0.152075
H 2.366785 -3.094622 -0.888962
H 3.566394 -2.241774 -0.432405
O 0.883269 -1.799055 1.140022
H 0.536481 -2.037993 2.007165
H 1.734828 -2.264065 1.014859
el energy= -2131.16994295
zpe= -2130.860043
th energy= -2130.830869
th enthalpy= -2130.829925
free energy= -2130.922075

TS1
P -2.330820 -0.538798 0.172351
O -2.017239 -2.098816 0.177389
O -3.740778 -0.489134 -0.580555
C -2.170636 -2.890003 -1.021737
H -3.224177 -2.928512 -1.298925
H -1.565361 -2.467689 -1.825552

H -1.800719 -3.881113 -0.768458
C -4.520212 0.723232 -0.586899
H -3.942114 1.543966 -1.017666
H -5.390486 0.515288 -1.204981
H -4.825909 0.969462 0.431167
S -2.234262 0.205697 1.962650
S -1.133594 0.385072 -1.291163
C 0.395771 0.728303 -0.343840
C 0.718370 2.220726 -0.321103
O -0.309725 2.956139 0.073496
C -0.056562 4.366434 0.172771
C 1.579807 -0.043231 -0.891466
C 2.774929 0.047860 0.016284
O 3.916158 0.076747 -0.651831
C 5.100272 0.039114 0.160023
O 1.814482 2.654155 -0.591239
O 2.694429 0.083842 1.229975
H 0.216215 0.441630 0.697491
H -0.990613 4.808818 0.509172
H 0.741496 4.551647 0.892755
H 0.230119 4.762608 -0.802105
H 1.275962 -1.200882 -0.920125
H 1.825741 0.201089 -1.925487
H 5.934200 0.059012 -0.537337
H 5.128478 0.905900 0.821167
H 5.099175 -0.881513 0.745162
O 0.805624 -2.434665 -0.668974
H 0.568831 -2.272460 0.287280
O 3.582709 -2.777634 -0.096272
H 2.643943 -2.883197 -0.322825
H 3.991279 -2.503366 -0.925221
O 0.610793 -1.709823 1.914529
H -0.178858 -1.293882 2.289836
H 1.328724 -1.058269 1.989239
el energy= -2131.15574050
zpe= -2130.850984
th energy= -2130.822623
th enthalpy= -2130.821679
free energy= -2130.911029

3
P -2.163482 -0.560020 0.360281
O -2.112543 -2.154897 0.322059
O -3.596936 -0.295315 -0.310336
C -2.630596 -2.880396 -0.813290
H -3.718860 -2.829496 -0.811391
H -2.233715 -2.472485 -1.746237
H -2.284358 -3.904177 -0.694183
C -4.119622 1.045125 -0.349004
H -3.385672 1.727813 -0.786231
H -5.009732 1.004180 -0.972880
H -4.376581 1.367892 0.661277
S -1.864476 0.172779 2.122779
S -0.917720 0.124568 -1.210597
```

C 0.519653 0.827862 -0.322312  
 C 0.558962 2.348326 -0.491987  
 O -0.571961 2.914211 -0.084796  
 C -0.612720 4.345409 -0.176893  
 C 1.794959 0.207013 -0.769575  
 C 2.936021 0.337365 0.121310  
 O 4.058171 -0.204589 -0.396849  
 C 5.216866 -0.114387 0.443045  
 O 1.517087 2.952132 -0.910477  
 O 2.895069 0.873169 1.211837  
 H 0.384813 0.626864 0.748092  
 H -1.594731 4.635454 0.188469  
 H 0.173688 4.782350 0.440018  
 H -0.479207 4.657346 -1.213652  
 H 0.264210 -2.356924 -1.891831  
 H 1.924275 -0.198439 -1.764872  
 H 6.026264 -0.572425 -0.120393  
 H 5.441651 0.930371 0.661218  
 H 5.045105 -0.652126 1.377517  
 O 0.451914 -3.018431 -1.214809  
 H 0.223735 -2.575013 -0.373306  
 O 2.941833 -2.852215 -0.006690  
 H 2.234481 -3.033013 -0.655932  
 H 3.504975 -2.184804 -0.420549  
 O 0.767077 -1.698944 1.192913  
 H 0.395370 -2.029004 2.018785  
 H 1.652820 -2.100499 1.086372  
 el energy= -2131.20042531  
 zpe= -2130.890740  
 th energy= -2130.861175  
 th enthalpy= -2130.860231  
 free energy= -2130.952457

4  
 C 1.331474 -0.570278 -0.377800  
 C 2.658240 0.022921 -0.058890  
 O 3.612612 -0.909846 -0.057075  
 C 4.930857 -0.435915 0.241301  
 C 0.251376 0.205862 -0.425778  
 C -1.071055 -0.387334 -0.744925  
 O -1.985428 0.557392 -0.983056  
 C -3.305761 0.091547 -1.302365  
 O 2.855802 1.195195 0.170315  
 O -1.311668 -1.576933 -0.795807  
 H 1.275950 -1.637659 -0.564625  
 H 5.576742 -1.309611 0.201431  
 H 5.239513 0.305529 -0.497468  
 H 4.952266 0.013966 1.235215  
 H 0.291397 1.273925 -0.231429  
 H -3.892755 0.984293 -1.501426  
 H -3.271548 -0.555932 -2.179003  
 H -3.714703 -0.456715 -0.452779  
 O -1.917099 0.559030 1.732199  
 H -3.906360 -2.132298 1.409170  
 H -2.416988 -0.302209 1.748729  
 O -2.968969 -1.918558 1.483034  
 H -2.560471 -2.197454 0.648828

O -1.196018 3.021398 0.390000  
 H -1.471858 2.400517 1.079227  
 H -1.585820 2.631408 -0.402007  
 el energy= -762.658263457  
 zpe= -762.456526  
 th energy= -762.436874  
 th enthalpy= -762.435930  
 free energy= -762.506375

TS2  
 C -1.363555 -0.499714 0.240948  
 C -2.741759 0.014961 0.030178  
 O -3.639075 -0.972444 0.094826  
 C -5.000680 -0.574829 -0.099749  
 C -0.332803 0.337243 0.199068  
 C 1.061342 -0.156512 0.418973  
 O 1.780270 0.759648 1.094255  
 C 3.103781 0.362415 1.469074  
 O -3.028208 1.173828 -0.175001  
 O 1.346263 -1.383621 0.456389  
 H -1.232805 -1.561277 0.421248  
 H -5.590921 -1.484184 -0.015878  
 H -5.294895 0.146773 0.664166  
 H -5.124272 -0.125606 -1.086545  
 H -0.452459 1.399282 0.007223  
 H 3.542032 1.224193 1.966552  
 H 3.067061 -0.493060 2.144866  
 H 3.679814 0.106145 0.577514  
 O 1.647170 -0.105551 -1.287939  
 H 4.647544 -1.633311 -0.947562  
 H 2.493123 -0.633500 -1.294264  
 O 3.713429 -1.831075 -1.084102  
 H 3.397014 -2.206536 -0.250889  
 O 1.347029 2.823735 -0.901688  
 H 1.557657 1.978452 -1.322354  
 H 1.618123 2.665078 0.011065  
 el energy= -762.634208849  
 zpe= -762.432333  
 th energy= -762.413813  
 th enthalpy= -762.412869  
 free energy= -762.479960

5  
 C -1.395498 -0.516023 0.137615  
 C -2.761564 0.037098 -0.048052  
 O -3.691823 -0.905892 0.133606  
 C -5.045292 -0.468470 -0.025424  
 C -0.339855 0.276839 -0.003913  
 C 1.080121 -0.206401 0.158445  
 O 1.630941 0.569458 1.184272  
 C 3.040406 0.428299 1.364228  
 O -3.018315 1.187818 -0.327560  
 O 1.186687 -1.552221 0.476835  
 H -1.300558 -1.567797 0.383212  
 H -5.664340 -1.344069 0.155320  
 H -5.274192 0.319152 0.694423  
 H -5.202586 -0.088784 -1.036416

H -0.450034 1.328387 -0.257432  
H 3.282232 0.956095 2.285095  
H 3.316930 -0.623960 1.460324  
H 3.582217 0.883622 0.529539  
O 1.730605 -0.084148 -1.057682  
H 4.696514 -1.356138 -0.781452  
H 2.566151 -0.630270 -1.053827  
O 3.828745 -1.685495 -1.045141  
H 3.653720 -2.443575 -0.473355  
O 1.580827 2.815272 -0.673100  
H 1.781046 2.009519 -1.169633  
H 1.561652 2.491418 0.236972

el energy= -762.658825275  
zpe= -762.454177  
th energy= -762.436023  
th enthalpy= -762.435079  
free energy= -762.501527

TS3

C -1.363535 -0.553852 0.047851  
C -2.733476 -0.005760 -0.129179  
O -3.656141 -0.858752 0.324350  
C -5.011876 -0.415692 0.199812  
C -0.310611 0.159161 -0.336018  
C 1.078377 -0.370957 -0.174016  
O 1.528275 0.453370 1.290520  
C 2.916635 0.536851 1.500419  
O -2.994257 1.071798 -0.617279  
O 1.300586 -1.489820 0.402762  
H -1.254203 -1.535391 0.496272  
H -5.625010 -1.216289 0.606600  
H -5.159748 0.506721 0.763929  
H -5.255436 -0.239391 -0.849207  
H -0.413599 1.145007 -0.780573  
H 3.060937 1.460120 2.075198  
H 3.283632 -0.302081 2.096503  
H 3.468770 0.621358 0.559543  
O 1.888111 0.056869 -1.154050  
H 4.671202 -1.483338 -0.585858  
H 2.703471 -0.527061 -1.168332  
O 3.794842 -1.704154 -0.924279  
H 3.325899 -2.143518 -0.198674  
O 1.472304 2.850821 -0.464404  
H 1.837245 2.084178 -0.927620  
H 1.234009 2.490117 0.398050

el energy= -762.645575827  
zpe= -762.443200  
th energy= -762.425071  
th enthalpy= -762.424127  
free energy= -762.490663

6

C -1.338462 -0.658955 0.049605  
C -2.698769 -0.101035 -0.178606  
O -3.596313 -0.685139 0.617712  
C -4.940924 -0.213335 0.474062  
C -0.303713 -0.199445 -0.649787

C 1.057580 -0.755250 -0.420289  
O 1.374434 1.176405 1.553734  
C 2.746875 1.092481 1.619594  
O -2.966086 0.768323 -0.977832  
O 1.327445 -1.542389 0.469810  
H -1.217960 -1.438390 0.794684  
H -5.534076 -0.786538 1.182393  
H -4.991456 0.852405 0.702932  
H -5.290788 -0.380734 -0.545870  
H -0.418043 0.590273 -1.385289  
H 3.064660 2.024615 2.121634  
H 3.080940 0.257845 2.246144  
H 3.217249 1.079705 0.627974  
O 1.952269 -0.295202 -1.288039  
H 4.750421 -1.173916 -0.005762  
H 2.839599 -0.724398 -1.074603  
O 3.997747 -1.615369 -0.417859  
H 3.450830 -1.960163 0.305610  
O 1.293235 2.528910 -1.048442  
H 1.727288 1.772215 -1.462340  
H 1.123968 2.216009 -0.147643

el energy= -762.675738784  
zpe= -762.474033  
th energy= -762.454521  
th enthalpy= -762.453576  
free energy= -762.525110

7

C 1.695558 -0.490414 -0.037722  
C 3.053859 0.099311 0.127993  
O 3.963145 -0.593582 -0.556221  
C 5.305844 -0.101232 -0.462656  
C 0.661966 0.078366 0.582082  
C -0.710202 -0.487109 0.508064  
O -3.583523 0.636397 -0.996011  
C -4.260454 1.044093 0.183817  
O 3.300954 1.078463 0.794911  
O -0.975597 -0.956197 -0.699532  
H 1.599705 -1.376447 -0.655767  
H 5.909857 -0.770399 -1.070275  
H 5.357668 0.919465 -0.844678  
H 5.638884 -0.116671 0.576227  
H 0.775342 0.962530 1.200674  
H -4.430355 2.120700 0.114770  
H -5.229776 0.543926 0.281544  
H -3.663965 0.838621 1.081171  
O -1.494591 -0.571068 1.431625  
H -2.925344 -1.705048 0.714090  
H -3.462295 -0.329806 -0.916314  
O -3.442838 -1.935038 -0.075011  
H -3.003689 -2.703440 -0.458380  
O -1.206695 1.929719 -0.498501  
H -1.507114 2.555046 0.170095  
H -2.025185 1.493882 -0.812705

el energy= -762.658337636  
zpe= -762.455587  
th energy= -762.435984

th enthalpy= -762.435039  
free energy= -762.505939

th energy= -722.696291  
th enthalpy= -722.695347  
free energy= -722.758548

8  
C 1.807624 -0.630713 -0.254050  
C 3.276577 -0.306803 0.031440  
O 3.998545 -1.305096 0.255091  
C 0.908076 0.309016 -0.548363  
C -0.498446 -0.040511 -0.812577  
O -1.237221 1.043786 -1.093563  
C -2.642091 0.820250 -1.254057  
O 3.595548 0.903456 0.007840  
O -0.970122 -1.164404 -0.783305  
H 1.505006 -1.675370 -0.214662  
H 1.193693 1.354709 -0.581172  
H -3.073682 1.790206 -1.488900  
H -2.824651 0.111611 -2.063384  
H -3.057218 0.431937 -0.321689  
O -1.436019 -0.297956 1.848592  
H -4.084642 -1.750025 0.421139  
H -2.177431 -0.880573 1.527523  
O -3.182580 -1.997666 0.654615  
H -2.661575 -1.917706 -0.160945  
O -0.766398 2.503313 1.353213  
H -1.068781 1.608660 1.571770  
H -0.875182 2.535647 0.396100  
el energy= -722.899911016  
zpe= -722.739509  
th energy= -722.721808  
th enthalpy= -722.720863  
free energy= -722.787832

9  
C -1.644884 -0.705571 -0.203298  
C -3.042591 -0.292812 -0.081856  
O -4.032454 -1.008757 -0.044396  
C -0.653448 0.182806 -0.272195  
C 0.804391 -0.262166 -0.349761  
O 1.406851 0.285676 0.901267  
C 1.213841 -0.557314 2.017653  
O -3.317624 0.997575 -0.001524  
O 1.007642 -1.530822 -0.499037  
H -1.441704 -1.770869 -0.242845  
H -0.830506 1.257438 -0.232320  
H 0.146972 -0.727910 2.217345  
H 1.694984 -1.528021 1.866331  
H 1.658326 -0.057588 2.881071  
O 1.391594 0.578274 -1.351006  
H 3.546503 -0.479884 0.213851  
H 2.299587 0.234206 -1.431463  
O 3.595737 -1.070270 -0.549963  
H 2.678239 -1.466799 -0.535912  
O 0.940942 2.954384 0.104367  
H 1.170532 2.416089 -0.670437  
H 1.071717 2.285207 0.793466  
el energy= -722.893956684  
zpe= -722.731628  
th energy= -722.715601  
th enthalpy= -722.714657  
free energy= -722.776030

TS4  
C -1.829546 -0.683174 0.186470  
C -3.295729 -0.299695 -0.021015  
O -4.097548 -1.262582 -0.013940  
C -0.848564 0.213935 0.183443  
C 0.571848 -0.171872 0.400204  
O 1.222308 0.783428 1.104135  
C 2.573737 0.490879 1.463889  
O -3.542046 0.918501 -0.178872  
O 0.965675 -1.375986 0.427394  
H -1.604342 -1.737485 0.334062  
H -1.050799 1.269511 0.032779  
H 2.941041 1.371940 1.985476  
H 2.616396 -0.382698 2.116415  
H 3.169941 0.309839 0.566673  
O 1.209691 -0.060548 -1.280284  
H 4.300039 -1.445685 -0.804146  
H 2.090079 -0.518751 -1.271054  
O 3.390901 -1.684646 -1.019185  
H 3.010942 -2.037236 -0.202133  
O 0.794853 2.837138 -0.887575  
H 0.988087 1.980476 -1.294190  
H 0.957469 2.647217 0.044787  
el energy= -722.873434559  
zpe= -722.712947

TS5  
C -1.586434 -0.613647 -0.462020  
C -2.937971 -0.176537 0.009412  
O -3.503791 -0.389191 1.061106  
C -0.558502 0.268975 -0.561244  
C 0.819413 -0.224981 -0.828490  
O 1.096172 0.037151 1.007895  
C 0.644696 -1.047152 1.761149  
O -3.309751 0.445115 -1.049359  
O 1.059239 -1.407870 -1.108831  
H -1.457014 -1.644683 -0.781587  
H -0.682891 1.327881 -0.355885  
H -0.394026 -0.918478 2.105783  
H 0.691956 -1.975636 1.169250  
H 1.277290 -1.184037 2.649088  
O 1.637053 0.790391 -1.263832  
H 2.850240 -0.370467 0.632596  
H 2.545891 0.441861 -1.178855  
O 3.557616 -0.725941 0.053102  
H 3.062705 -1.422532 -0.406956  
O 0.911357 2.758777 0.753729  
H 1.306714 2.579947 -0.110003  
H 0.928753 1.858735 1.133241  
el energy= -722.884398558

zpe= -722.722753  
th energy= -722.707210  
th enthalpy= -722.706265  
free energy= -722.765973

el energy= -722.895908917  
zpe= -722.736238  
th energy= -722.717475  
th enthalpy= -722.716531  
free energy= -722.786136

10

C -1.867165 -0.800593 0.131087  
C -3.262631 -0.174806 0.073156  
O -4.155261 -0.828105 0.660888  
C -0.797235 -0.226922 -0.420584  
C 0.538625 -0.851268 -0.343352  
O 1.049656 1.344382 1.437873  
C 2.423532 1.268958 1.381407  
O -3.363549 0.909702 -0.544352  
O 0.814428 -1.852296 0.299362  
H -1.763236 -1.750357 0.652481  
H -0.884910 0.722649 -0.939092  
H 2.783075 1.756517 2.304736  
H 2.763135 0.225615 1.432517  
H 2.846311 1.791156 0.515922  
O 1.455598 -0.193892 -1.066119  
H 4.206055 -1.491016 0.106722  
H 2.332345 -0.657910 -0.956576  
O 3.485383 -1.764848 -0.472888  
H 2.835470 -2.216689 0.090624  
O 0.821533 2.642232 -1.130829  
H 1.148148 1.779484 -1.420838  
H 0.660530 2.490930 -0.188271

el energy= -722.917309676

zpe= -722.756780

th energy= -722.739205

th enthalpy= -722.738260

free energy= -722.804773

11

C 1.916822 -0.774619 -0.088487  
C 3.322136 -0.158416 -0.088514  
O 4.209456 -0.892959 -0.576885  
C 0.856970 -0.125397 0.394456  
C -0.472099 -0.771354 0.361718  
O -1.219251 1.224819 -1.421248  
C -2.594154 0.911188 -1.488754  
O 3.424631 0.991400 0.392237  
O -0.804256 -1.760870 -0.271135  
H 1.802466 -1.772795 -0.506230  
H 0.942890 0.867897 0.822846  
H -2.788238 0.455035 -2.462888  
H -2.896102 0.196427 -0.710654  
H -3.226653 1.803896 -1.400228  
O -1.331029 -0.182081 1.183406  
H -4.101506 -1.786831 -0.087245  
H -1.680887 2.190866 1.541464  
O -3.484980 -1.899669 0.644586  
H -2.630245 -2.062074 0.213437  
O -0.970220 2.562152 1.004729  
H -1.110405 3.516384 1.019375  
H -1.084179 1.760462 -0.617907

12

C 0.425113 -0.159658 -0.213577  
C 1.661062 0.669473 -0.455216  
O 2.770632 0.087697 -0.377062  
C -0.739951 0.073840 -0.822008  
C -1.968735 -0.794261 -0.608743  
O -2.794600 -0.817874 -1.544762  
O 1.501186 1.896879 -0.722899  
O -2.041488 -1.414803 0.491293  
H 0.520049 -1.008895 0.458745  
H -0.825156 0.886428 -1.542484  
O -0.710668 2.589927 0.430006  
H -0.918251 1.170062 1.834286  
H 0.169961 2.370068 -0.040862  
O -1.151614 0.425179 2.409469  
H -1.428893 -0.265081 1.771946  
O 2.602837 -2.448019 0.567147  
H 2.697150 -1.533180 0.210544  
H 2.109907 -2.907648 -0.120444

el energy= -683.156740946

zpe= -683.036645

th energy= -683.021941

th enthalpy= -683.020997

free energy= -683.080317

TS6

C -0.463780 -0.028100 -0.216190  
C -1.718455 -0.869093 -0.234973  
O -2.815220 -0.252473 -0.311966  
C 0.711443 -0.480790 -0.724888  
C 1.972761 0.374063 -0.775013  
O 2.847443 -0.004163 -1.579919  
O -1.567849 -2.114485 -0.160337  
O 2.014088 1.385569 -0.019382  
H -0.500804 0.947025 0.260132  
H 0.723786 -1.391126 -1.316792  
O 0.963768 -1.709305 1.007772  
H 0.827282 -0.201169 2.178777  
H 0.101039 -2.106172 0.750200  
O 0.963974 0.721533 2.454446  
H 1.339435 1.085876 1.626163  
O -2.515628 2.426942 -0.210050  
H -2.661999 1.450697 -0.257981  
H -1.965162 2.609439 -0.978634

el energy= -683.150402231

zpe= -683.029392

th energy= -683.015450

th enthalpy= -683.014505

free energy= -683.071859

13

C 1.245858 0.150906 0.298752  
C 1.960360 -1.079663 -0.122544  
O 3.155441 -0.974925 -0.471416  
C -0.215145 0.152193 0.624291  
C -0.951710 0.670890 -0.663019  
O -0.801630 1.900532 -0.899907  
O 1.288819 -2.174133 -0.092712  
O -1.576039 -0.152242 -1.363182  
H 1.747026 1.107525 0.212981  
H -0.423519 0.901807 1.403014  
O -0.653714 -1.106635 1.073482  
H -2.500034 -1.361177 0.908191  
H -0.010090 -1.741174 0.610257  
O -3.358300 -1.276644 0.456400  
H -3.025036 -0.898198 -0.374275  
O 0.828945 3.376317 0.643874  
H 0.698049 3.059263 1.543373  
H 0.209249 2.827863 0.099266

el energy= -683.202422181  
zpe= -683.080074  
th energy= -683.066117  
th enthalpy= -683.065173  
free energy= -683.125439

#### TS7

C 1.073324 0.295186 -0.408055  
C 2.198638 -0.712157 -0.100580  
O 3.365279 -0.284826 -0.122037  
C -0.320978 -0.109580 0.070797  
C -1.417800 0.899434 -0.352773  
O -1.162790 2.117894 -0.129821  
O 1.836895 -1.908373 0.134011  
O -2.476902 0.462339 -0.851638  
H 1.077329 0.552355 -1.473988  
H -0.310498 -0.099779 1.176044  
O -0.610491 -1.413156 -0.402319  
H -2.142224 -1.908844 0.632143  
H 0.253959 -1.880346 -0.216885  
O -3.021437 -1.620576 0.928310  
H -3.115778 -0.858335 0.329239  
O 1.239213 2.424319 0.888309  
H 1.397795 1.286024 0.152726  
H 0.282177 2.450656 0.585862

el energy= -683.160757805  
zpe= -683.041997  
th energy= -683.029549  
th enthalpy= -683.028605  
free energy= -683.083047

#### 14

C -0.689749 -0.096454 -0.585920  
C -2.117305 0.305228 -0.163015  
O -3.070749 -0.160720 -0.809637  
C 0.299197 -0.113199 0.590401  
C 1.694689 -0.532270 0.090451  
O 1.794227 -1.755959 -0.232649  
O -2.204440 1.117787 0.815980

O 2.610184 0.310640 -0.002463  
H -0.325226 0.649497 -1.305587  
H -0.022962 -0.895177 1.297228  
O 0.302457 1.147875 1.229622  
H 0.780025 2.397911 -0.158628  
H -0.685448 1.337600 1.258876  
O 1.341034 2.607363 -0.924588  
H 1.984010 1.884906 -0.803276  
O -0.353916 -3.149800 0.078530  
H -0.721479 -1.067159 -1.087106  
H 0.519713 -2.624893 -0.031372

el energy= -683.176411970  
zpe= -683.052738  
th energy= -683.039908  
th enthalpy= -683.038964  
free energy= -683.093663

#### 15

C 0.339136 -0.565370 -0.835805  
C 1.852419 -0.705215 -0.602817  
O 2.358329 -1.808041 -0.861690  
C -0.372917 0.564838 -0.100539  
C -1.832035 0.633505 -0.607329  
O -2.005487 1.297137 -1.651547  
O 2.511395 0.322294 -0.223046  
O -2.707053 -0.024092 0.022924  
H -0.138479 -1.509543 -0.555597  
H 0.103181 1.520665 -0.357138  
O -0.310638 0.366672 1.308588  
H -0.862801 -1.563555 1.694763  
H 0.434789 0.914416 1.612827  
O -1.624745 -2.090782 1.417480  
H -2.107100 -1.391452 0.915876  
O 1.823586 2.124689 1.343048  
H 0.190508 -0.431675 -1.914948  
H 2.097177 1.391585 0.637103

el energy= -683.170174468  
zpe= -683.046871  
th energy= -683.033974  
th enthalpy= -683.033030  
free energy= -683.088248

#### TS8

C 0.421651 -0.864744 0.415926  
C 1.958671 -0.752666 0.381163  
O 2.570337 -1.359357 1.276957  
C -0.374732 -0.058994 -0.607160  
C -1.830428 -0.631534 -0.643239  
O -1.994372 -1.594982 -1.414624  
O 2.501968 -0.103602 -0.570738  
O -2.676701 -0.123415 0.139553  
H 0.065230 -0.592522 1.415579  
H 0.052284 -0.198643 -1.607450  
O -0.408843 1.316631 -0.293836  
H -0.834502 1.549529 1.742819  
H 0.303491 1.830159 -0.946969  
O -1.548082 1.160138 2.264634



H -2.031808 0.693265 1.543937  
O 1.465793 2.113551 -1.238252  
H 0.189765 -1.927836 0.277893  
H 1.923763 1.221967 -1.015496  
el energy= -683.155423835  
zpe= -683.038049  
th energy= -683.025358  
th enthalpy= -683.024413  
free energy= -683.080427

16

C -0.300725 0.741764 -0.687224  
C -1.847251 0.861988 -0.580940  
O -2.307447 2.001674 -0.795858  
C 0.246383 -0.539355 -0.074649  
C 1.988762 -0.491010 -0.761778  
O 2.062019 -1.261268 -1.701520  
O -2.511236 -0.182343 -0.334768  
O 2.701069 0.310427 -0.176426  
H 0.155791 1.602024 -0.190765  
H -0.102513 -1.445523 -0.594411  
O 0.325761 -0.618350 1.212153  
H 0.925974 0.979747 1.873850  
H -0.971992 -2.074501 1.435361  
O 1.483096 1.780957 1.942351  
H 2.117606 1.572459 1.240680  
O -1.814002 -2.430280 1.111295  
H -0.051642 0.794493 -1.754517  
H -2.110311 -1.675551 0.559526  
el energy= -683.201125043  
zpe= -683.077800  
th energy= -683.063818  
th enthalpy= -683.062874  
free energy= -683.120453

18

P -2.701052 -0.089151 -0.257743  
O -2.942061 1.037329 0.854762  
O -1.906412 -1.265026 0.486387  
C -1.834100 1.580077 1.604684  
H -1.263843 0.773653 2.076027  
H -1.196568 2.171244 0.939062  
H -2.275597 2.229117 2.358309  
C -2.523489 -1.885927 1.636239  
H -3.450262 -2.376763 1.331841  
H -1.804501 -2.611922 2.005609  
H -2.715328 -1.137076 2.406198  
S -4.360379 -0.521009 -1.155263  
S -1.215425 0.567792 -1.580603  
C 0.351945 0.118654 -0.703811  
C 1.314821 1.243102 -1.050929  
O 1.261998 2.238901 -0.156431  
C 2.179146 3.320242 -0.401217  
C 0.867747 -1.226438 -1.206342  
C 2.073284 -1.658018 -0.401999  
O 3.092729 -2.028553 -1.157735  
C 4.266899 -2.459280 -0.448936

O 1.999876 1.257200 -2.041119  
O 2.099184 -1.674912 0.815677  
H 0.174968 0.083381 0.374638  
H 2.014186 4.035774 0.400752  
H 3.200215 2.934480 -0.378710  
H 1.972573 3.771462 -1.371539  
H 0.086474 -1.976988 -1.055710  
H 1.118637 -1.169220 -2.265512  
H 4.996903 -2.705986 -1.215716  
H 4.623380 -1.648713 0.187657  
H 4.034010 -3.334589 0.158871  
O 3.567769 0.510922 0.546667  
H 3.056383 0.693657 1.372599  
O 0.092664 -0.888420 2.691779  
H 0.690683 -0.145436 2.875026  
H 0.588653 -1.390327 2.027588  
O 1.774920 1.355518 2.486174  
H 2.046978 1.940312 3.204450  
H 1.327836 1.914514 1.833139  
el energy= -2131.16928230  
zpe= -2130.858769  
th energy= -2130.829975  
th enthalpy= -2130.829031  
free energy= -2130.918999

TS9

P -2.613949 -0.211305 -0.143500  
O -2.920978 1.042449 0.802602  
O -1.705090 -1.199610 0.736217  
C -1.844706 1.840474 1.347891  
H -1.095134 1.207639 1.833727  
H -1.380876 2.420588 0.547294  
H -2.312112 2.504447 2.072935  
C -2.136005 -1.560903 2.063866  
H -3.121723 -2.029761 2.023609  
H -1.397052 -2.269855 2.431112  
H -2.155571 -0.677959 2.704729  
S -4.263124 -0.915750 -0.878193  
S -1.221648 0.348257 -1.609401  
C 0.375158 -0.010385 -0.747994  
C 1.324833 1.143456 -1.033781  
O 0.925055 2.257087 -0.382990  
C 1.537984 3.479342 -0.815588  
C 0.928486 -1.355382 -1.209078  
C 1.912116 -1.939569 -0.220976  
O 2.991994 -2.428398 -0.817469  
C 3.975092 -2.997582 0.057241  
O 2.041616 1.218125 -2.058912  
O 1.725549 -2.010893 0.977644  
H 0.193672 -0.012767 0.327458  
H 1.082751 4.263763 -0.213834  
H 2.617159 3.451533 -0.646417  
H 1.339434 3.649342 -1.874014  
H 0.103567 -2.070604 -1.271913  
H 1.388730 -1.265109 -2.194067  
H 4.781656 -3.339149 -0.586825  
H 4.332189 -2.236717 0.753411

H 3.547587 -3.831066 0.615975  
O 2.771009 0.532505 -0.117730  
H 2.951067 1.343694 0.416645  
O 0.668561 0.083515 2.582313  
H 1.370600 0.731799 2.408476  
H 0.968793 -0.723079 2.134869  
O 2.538537 2.256318 1.948485  
H 3.169049 2.595209 2.595851  
H 1.854045 2.932007 1.864196

el energy= -2131.14179671  
zpe= -2130.832092  
th energy= -2130.803906  
th enthalpy= -2130.802962  
free energy= -2130.892039

19

P -2.584148 -0.166029 -0.265669  
O -2.952094 0.843358 0.922469  
O -1.742721 -1.345658 0.424566  
C -1.907778 1.406485 1.748371  
H -1.303401 0.609165 2.191986  
H -1.280178 2.069875 1.145506  
H -2.418815 1.978106 2.520752  
C -2.346604 -2.071143 1.516890  
H -3.240251 -2.589754 1.163187  
H -1.597973 -2.783920 1.853414  
H -2.593695 -1.386244 2.329562  
S -4.177895 -0.642921 -1.258844  
S -1.097696 0.707185 -1.452726  
C 0.450606 0.175515 -0.606386  
C 1.503197 1.327264 -0.692769  
O 1.002633 2.392225 0.062736  
C 1.763383 3.595317 -0.083909  
C 0.974358 -1.121522 -1.222687  
C 2.113786 -1.701820 -0.417873  
O 3.143814 -2.052843 -1.175172  
C 4.265825 -2.605635 -0.473495  
O 1.607718 1.611908 -2.024083  
O 2.082851 -1.868339 0.785923  
H 0.258222 0.035506 0.463911  
H 1.278479 4.342233 0.542140  
H 2.794281 3.443038 0.247089  
H 1.752862 3.925554 -1.126119  
H 0.165332 -1.857461 -1.199857  
H 1.281067 -0.969009 -2.258060  
H 5.002638 -2.844319 -1.236377  
H 4.661115 -1.868797 0.227816  
H 3.966997 -3.502815 0.069916  
O 2.741360 0.907816 -0.234428  
H 2.691918 0.882653 0.746932  
O 0.216835 -0.934789 2.709334  
H 0.859538 -0.223073 2.862124  
H 0.661900 -1.465014 2.030201  
O 2.049593 1.212473 2.401071  
H 2.650483 1.560074 3.072177  
H 1.480609 1.950422 2.135681

el energy= -2131.17568445

zpe= -2130.862851  
th energy= -2130.835285  
th enthalpy= -2130.834340  
free energy= -2130.920932

TS10

P -2.592279 -0.169114 -0.246912  
O -2.986283 0.661032 1.066380  
O -1.733287 -1.418685 0.285872  
C -1.954602 1.146242 1.954841  
H -1.314478 0.320887 2.279708  
H -1.361938 1.911934 1.445413  
H -2.477558 1.585050 2.802601  
C -2.332592 -2.285361 1.272785  
H -3.277716 -2.681117 0.894152  
H -1.622963 -3.093676 1.433600  
H -2.485018 -1.737843 2.203808  
S -4.181819 -0.548134 -1.292497  
S -1.143427 0.892172 -1.311819  
C 0.430299 0.299502 -0.560200  
C 1.454935 1.432210 -0.706134  
O 0.739599 2.648009 0.341223  
C 1.608424 3.707149 0.644147  
C 0.921973 -0.934939 -1.334594  
C 2.118673 -1.565875 -0.666339  
O 3.144668 -1.727878 -1.482430  
C 4.324168 -2.304724 -0.900315  
O 1.407918 2.188527 -1.711468  
O 2.133874 -1.904432 0.505628  
H 0.281968 0.051569 0.495353  
H 1.401668 3.941099 1.697481  
H 2.654687 3.406932 0.545614  
H 1.387093 4.591594 0.042433  
H 0.123703 -1.681973 -1.333753  
H 1.159153 -0.670140 -2.366544  
H 5.036215 -2.401878 -1.715573  
H 4.714012 -1.640828 -0.126544  
H 4.092319 -3.278223 -0.467703  
O 2.663448 1.157121 -0.185232  
H 2.603936 0.759795 0.724821  
O 0.197414 -1.274256 2.567307  
H 0.907426 -0.661860 2.811732  
H 0.575427 -1.722911 1.796297  
O 2.674724 0.089492 2.248316  
H 3.019335 -0.796114 2.056128  
H 3.306562 0.513132 2.843784

el energy= -2131.15592580  
zpe= -2130.845653  
th energy= -2130.818111  
th enthalpy= -2130.817167  
free energy= -2130.903909

20

P -2.376277 -0.331668 -0.228848  
O -3.074843 0.668464 0.765064  
O -1.624122 -1.439147 0.604131  
C -2.250819 1.444054 1.699550

H -1.489267 0.798390 2.147335  
H -1.779136 2.261153 1.152957  
H -2.947972 1.809722 2.449011  
C -2.229275 -2.020020 1.792523  
H -3.271254 -2.277297 1.595193  
H -1.652468 -2.918513 1.995651  
H -2.134566 -1.314210 2.616101  
S -3.906192 -1.023720 -1.381050  
S -1.008072 0.466918 -1.518164  
C 0.568782 0.019008 -0.671979  
C 1.629069 0.998958 -1.240974  
O 0.289672 2.874346 0.524982  
C 1.061079 3.884298 -0.097277  
C 1.003422 -1.417197 -0.990291  
C 2.224013 -1.737794 -0.157776  
O 3.293805 -2.007390 -0.894797  
C 4.501010 -2.245474 -0.159885  
O 1.367635 1.568276 -2.307244  
O 2.223563 -1.760577 1.057144  
H 0.435582 0.152232 0.404211  
H 0.530072 4.209294 -0.994636  
H 1.199452 4.753770 0.558768  
H 2.043956 3.505462 -0.400654  
H 0.222273 -2.127327 -0.710754  
H 1.226586 -1.521843 -2.053631  
H 5.265191 -2.453625 -0.904731  
H 4.758133 -1.356782 0.419195  
H 4.374643 -3.095531 0.511761  
O 2.698787 1.026740 -0.569772  
H 2.466531 1.184150 1.034611  
O 0.259195 -0.454930 2.688723  
H 0.934354 0.247852 2.642967  
H 0.686303 -1.163493 2.183252  
O 2.144233 1.437818 1.946997  
H 2.880580 1.860879 2.401715  
H 0.856317 2.465757 1.206664

el energy= -2131.16082240  
zpe= -2130.849706  
th energy= -2130.820801  
th enthalpy= -2130.819857  
free energy= -2130.910787

21

P -2.446288 -0.437486 -0.240072  
O -2.946819 0.586087 0.886713  
O -1.494012 -1.472266 0.533587  
C -1.983816 1.285153 1.705426  
H -1.266733 0.581392 2.139597  
H -1.464026 2.031040 1.098178  
H -2.559996 1.777298 2.486831  
C -2.036202 -2.196004 1.658654  
H -2.894118 -2.789656 1.335693  
H -1.236475 -2.841366 2.013108  
H -2.322847 -1.498766 2.447295  
S -3.966571 -1.150268 -1.209765  
S -1.060263 0.530477 -1.478007  
C 0.548809 0.163462 -0.663514

C 1.525946 1.225420 -1.163686  
O 0.512736 3.061830 0.515823  
C 0.571284 4.155674 -0.314498  
C 1.077262 -1.210889 -1.103220  
C 2.309129 -1.604675 -0.320919  
O 3.131763 -2.364253 -1.028635  
C 4.296937 -2.836229 -0.333517  
O 1.421958 1.732737 -2.256687  
O 2.512125 -1.288138 0.835486  
H 0.442049 0.194709 0.424779  
H 0.643718 5.103175 0.228276  
H 1.498471 4.013742 -0.902419  
H -0.250723 4.149722 -1.041151  
H 0.316120 -1.970238 -0.900529  
H 1.291071 -1.220522 -2.173986  
H 4.840207 -3.444908 -1.051661  
H 4.902787 -1.990368 -0.006577  
H 4.000510 -3.429976 0.531944  
O 2.567315 1.484001 -0.383216  
H 2.425154 1.209663 0.556638  
O 0.414470 -0.764111 2.767197  
H 0.931665 0.056226 2.826300  
H 0.924876 -1.263679 2.114865  
O 1.981988 1.506991 2.230296  
H 2.740403 1.721235 2.788440  
H 1.493255 2.335718 2.096952

el energy= -2131.18148415  
zpe= -2130.872567  
th energy= -2130.843153  
th enthalpy= -2130.842209  
free energy= -2130.935914

22

P -2.390973 -0.230627 -0.248108  
O -2.762092 0.372974 1.190792  
O -1.289005 -1.365002 0.041827  
C -1.734321 0.945640 2.033204  
H -0.936754 0.222194 2.216721  
H -1.312861 1.838170 1.562046  
H -2.229376 1.210876 2.965869  
C -1.596104 -2.406254 0.987492  
H -2.554131 -2.871188 0.741421  
H -0.792106 -3.134126 0.893271  
H -1.623528 -1.996527 1.999898  
S -4.011691 -0.779977 -1.170801  
S -1.255192 1.140609 -1.321904  
C 0.407157 0.987660 -0.534150  
C 1.025963 2.420039 -0.528024  
O 0.650776 3.161398 0.419602  
C 1.256595 -0.022901 -1.276083  
C 2.535217 -0.266229 -0.516798  
O 3.356482 -1.092266 -1.181526  
C 4.566846 -1.440910 -0.492154  
O 1.807912 2.685814 -1.455159  
O 2.803954 0.179117 0.578947  
H 0.270299 0.663036 0.496438  
H 0.736119 -0.981692 -1.372329

H 1.510156 0.342209 -2.274104  
H 5.109034 -2.101759 -1.164093  
H 5.149360 -0.544760 -0.277318  
H 4.324797 -1.952241 0.441828  
O 0.973219 -1.212300 1.988173  
H 1.202760 -1.828467 1.248331  
O 1.552380 -3.046057 -0.013775  
H 1.958583 -3.830163 0.375809  
H 2.105585 -2.822642 -0.774960  
O 1.146327 1.688337 2.710939  
H 0.967171 2.277974 1.949436  
H 1.561870 0.919990 2.297160  
el energy= -2091.42178000  
zpe= -2091.152922  
th energy= -2091.126048  
th enthalpy= -2091.125104  
free energy= -2091.210164

TS11

P -2.409908 -0.472374 -0.187799  
O -2.790789 -0.111633 1.331260  
O -1.115760 -1.414592 -0.072195  
C -1.806263 0.468698 2.213241  
H -0.912507 -0.156799 2.268343  
H -1.522156 1.466694 1.867326  
H -2.280473 0.531671 3.191091  
C -1.161298 -2.616358 0.715427  
H -1.778987 -3.365149 0.214928  
H -0.129627 -2.958657 0.789517  
H -1.560962 -2.407010 1.710568  
S -3.966599 -1.188275 -1.104320  
S -1.569800 1.187800 -1.119149  
C 0.143479 1.178085 -0.419150  
C 0.531203 2.680190 -0.290808  
O 0.429453 3.169280 0.865677  
C 1.078317 0.372080 -1.304228  
C 2.336048 0.008745 -0.552180  
O 3.093891 -0.859791 -1.260109  
C 4.465015 -0.959361 -0.854681  
O 0.861354 3.253614 -1.343574  
O 2.868416 0.756837 0.313832  
H 0.096999 0.737039 0.571577  
H 0.620117 -0.555547 -1.650242  
H 1.366317 0.977315 -2.170069  
H 4.906213 -1.718185 -1.498522  
H 4.970840 -0.002955 -0.993737  
H 4.543925 -1.262883 0.190958  
O 1.650280 -0.943151 0.838704  
H 2.338591 -1.647008 0.939172  
O 2.865669 -3.284044 0.459189  
H 3.696815 -3.730112 0.659743  
H 2.843305 -3.198433 -0.502890  
O 1.088489 1.301766 2.788815  
H 0.872486 2.007755 2.141457  
H 1.533080 0.636705 2.244757  
el energy= -2091.39520251  
zpe= -2091.126314

th energy= -2091.100312  
th enthalpy= -2091.099368  
free energy= -2091.183589

23

P -2.428434 -0.271596 -0.205486  
O -2.921976 0.465233 1.133506  
O -1.306768 -1.315386 0.285007  
C -1.978695 1.134601 1.997444  
H -1.210199 0.444236 2.351349  
H -1.496327 1.965019 1.471968  
H -2.560927 1.510086 2.837100  
C -1.690984 -2.361645 1.199573  
H -2.486571 -2.967453 0.759536  
H -0.795793 -2.961495 1.345343  
H -2.029575 -1.929373 2.144019  
S -3.957003 -0.988888 -1.166463  
S -1.273465 1.036487 -1.335310  
C 0.347557 0.980892 -0.445829  
C 0.872274 2.445748 -0.469182  
O 0.681137 3.107321 0.585680  
C 1.263332 -0.015490 -1.128676  
C 2.515599 -0.312968 -0.264437  
O 3.214275 -1.328968 -0.938882  
C 4.455926 -1.667593 -0.321989  
O 1.394492 2.819726 -1.533368  
O 3.207710 0.855064 -0.192432  
H 0.161693 0.674433 0.581238  
H 0.769048 -0.985702 -1.245817  
H 1.579928 0.359948 -2.103095  
H 4.940228 -2.389875 -0.977562  
H 5.089333 -0.780362 -0.225386  
H 4.294186 -2.111375 0.664091  
O 2.194852 -0.710786 1.034824  
H 1.767725 -1.594745 0.962456  
O 1.367897 -3.168510 0.224392  
H 1.735451 -3.926050 0.696152  
H 1.966933 -3.016768 -0.523165  
O 1.067135 1.404198 2.733750  
H 0.928189 2.073031 2.029707  
H 1.560582 0.704393 2.281484  
el energy= -2091.42617722  
zpe= -2091.154616  
th energy= -2091.129003  
th enthalpy= -2091.128059  
free energy= -2091.211232

TS12

P -2.440863 -0.173963 -0.065738  
O -2.553043 -0.011433 1.528794  
O -1.401934 -1.382326 -0.261346  
C -1.384589 0.027854 2.374699  
H -0.581426 -0.593803 1.966266  
H -1.035335 1.056742 2.477878  
H -1.698528 -0.356800 3.344194  
C -1.738747 -2.681723 0.269559  
H -2.604685 -3.082239 -0.261857

H -0.855645 -3.293750 0.098768  
 H -1.958249 -2.607847 1.337702  
 S -4.214159 -0.384564 -0.833219  
 S -1.441957 1.442030 -0.915056  
 C 0.289214 1.234251 -0.332875  
 C 0.993150 2.593580 -0.467548  
 O 0.372224 3.611387 -0.768527  
 C 1.095312 0.156596 -1.057491  
 C 2.178329 -0.295353 -0.085536  
 O 3.008083 -1.374035 -1.140956  
 C 4.284212 -1.705793 -0.599146  
 O 2.258103 2.558329 -0.249271  
 O 3.043420 0.625180 0.266749  
 H 0.270107 1.005948 0.734540  
 H 0.478278 -0.709834 -1.295812  
 H 1.545923 0.552121 -1.969673  
 H 4.725824 -2.494232 -1.211198  
 H 4.917288 -0.819003 -0.622809  
 H 4.179950 -2.051799 0.434886  
 O 1.771475 -1.086211 0.908503  
 H 1.447778 -2.134422 0.379907  
 O 1.412651 -3.004075 -0.445876  
 H 1.791948 -3.813769 -0.082341  
 H 2.321350 -2.272323 -0.990579  
 O 1.596267 1.230066 2.627502  
 H 2.105583 1.686858 1.940968  
 H 1.701386 0.306624 2.343090  
 el energy= -2091.38449298  
 zpe= -2091.119148  
 th energy= -2091.094716  
 th enthalpy= -2091.093772  
 free energy= -2091.174286

24

P -2.124962 0.367190 0.245683  
 O -1.425713 0.471568 1.686017  
 O -1.745846 -1.090862 -0.313216  
 C -0.480717 -0.481621 2.226943  
 H -0.246183 -1.270099 1.509166  
 H 0.429643 0.051990 2.510556  
 H -0.937430 -0.917585 3.116744  
 C -2.477100 -2.244860 0.148846  
 H -3.519262 -2.167084 -0.164831  
 H -1.992860 -3.103359 -0.309860  
 H -2.415475 -2.329885 1.236764  
 S -4.020176 0.789926 0.286791  
 S -1.074783 1.660352 -1.009436  
 C 0.616723 1.432459 -0.343857  
 C 1.481739 2.579640 -0.868361  
 O 1.020775 3.509747 -1.517249  
 C 1.258643 0.086665 -0.694836  
 C 2.388623 -0.192476 0.277472  
 O 0.298334 -2.557027 -2.364644  
 C 1.671689 -2.795704 -2.586309  
 O 2.741418 2.469389 -0.600035  
 O 3.080031 0.806152 0.668629  
 H 0.550962 1.548823 0.742386

H 0.542817 -0.735922 -0.661124  
 H 1.657391 0.115251 -1.715422  
 H 1.910895 -3.867938 -2.611521  
 H 1.942251 -2.365709 -3.554248  
 H 2.301515 -2.329721 -1.815189  
 O 2.584050 -1.347946 0.709410  
 H 1.322269 -2.530451 0.469545  
 O 0.506522 -3.061803 0.323789  
 H 0.724013 -3.961923 0.591402  
 H 0.144325 -2.796300 -1.431770  
 O 2.742909 -0.204495 3.345130  
 H 3.000557 0.577115 2.838952  
 H 2.800920 -0.891909 2.663483  
 el energy= -2091.42620442  
 zpe= -2091.157145  
 th energy= -2091.129631  
 th enthalpy= -2091.128687  
 free energy= -2091.217384

25

P -2.558442 -0.317281 0.050509  
 O -2.823845 0.576808 1.344307  
 O -1.503855 -1.387460 0.614373  
 C -1.755741 1.135113 2.129501  
 H -1.054287 0.350752 2.425869  
 H -1.251339 1.923268 1.562610  
 H -2.224545 1.562240 3.013275  
 C -1.328071 -2.643874 -0.076215  
 H -1.308008 -2.490755 -1.158906  
 H -0.375876 -3.052475 0.258757  
 H -2.150683 -3.311651 0.181745  
 S -4.199385 -0.966995 -0.731988  
 S -1.455858 0.812455 -1.345497  
 C 0.255624 0.734329 -0.656725  
 C 0.828120 2.134856 -0.785619  
 O 0.720748 2.818114 0.358748  
 C 1.187249 4.178692 0.308438  
 C 1.109239 -0.280506 -1.404396  
 C 2.444234 -0.409654 -0.713888  
 O 3.009922 -1.595664 -0.917418  
 C 4.245852 -1.825311 -0.217321  
 O 1.285891 2.584152 -1.805998  
 O 2.954571 0.466907 -0.045270  
 H 0.204037 0.463228 0.396331  
 H 1.011760 4.585975 1.300670  
 H 2.249842 4.194052 0.064246  
 H 0.626363 4.733395 -0.444051  
 H 0.624986 -1.257103 -1.430528  
 H 1.273201 0.049598 -2.435522  
 H 4.530457 -2.847061 -0.454637  
 H 5.003447 -1.118419 -0.554842  
 H 4.083906 -1.710226 0.856313  
 O 1.176490 -1.492213 1.469940  
 H 1.248035 -0.654799 2.004745  
 O 1.881667 -3.997814 0.374680  
 H 1.698792 -3.438951 1.141294  
 H 2.023586 -3.350664 -0.328469

O 1.700434 0.983233 2.428119  
H 1.123841 1.740602 2.260940  
H 2.387778 1.070476 1.747783  
el energy= -2131.16654662  
zpe= -2130.856559  
th energy= -2130.827356  
th enthalpy= -2130.826412  
free energy= -2130.917003

TS13

P -2.607277 -0.418836 0.020135  
O -3.036110 0.615863 1.153067  
O -1.533205 -1.319318 0.798333  
C -2.060944 1.368164 1.904756  
H -1.335495 0.700304 2.371226  
H -1.553003 2.081228 1.248992  
H -2.624267 1.906252 2.664325  
C -1.173878 -2.626146 0.301087  
H -1.231051 -2.659417 -0.790487  
H -0.150229 -2.818955 0.622499  
H -1.859468 -3.362466 0.721615  
S -4.130015 -1.294126 -0.785133  
S -1.465203 0.611124 -1.424929  
C 0.198064 0.648858 -0.623083  
C 0.753763 2.045015 -0.843261  
O 0.648558 2.805204 0.254166  
C 1.108361 4.161859 0.107936  
C 1.120724 -0.396209 -1.230197  
C 2.413150 -0.467032 -0.446171  
O 3.178951 -1.481822 -0.880112  
C 4.474657 -1.582036 -0.270757  
O 1.207248 2.431137 -1.890900  
O 2.909420 0.542237 0.123075  
H 0.069102 0.460803 0.442258  
H 0.940819 4.632639 1.073032  
H 2.168016 4.165042 -0.148806  
H 0.535820 4.661540 -0.673515  
H 0.659040 -1.383951 -1.228832  
H 1.361752 -0.128727 -2.263774  
H 4.894900 -2.520657 -0.625025  
H 5.099662 -0.742535 -0.576459  
H 4.371139 -1.592391 0.815565  
O 1.875678 -1.063913 1.172778  
H 1.621638 -0.281690 1.742925  
O 2.111112 -3.802013 0.503713  
H 2.183595 -3.071187 1.132239  
H 2.307191 -3.362484 -0.333844  
O 1.065067 1.083792 2.538219  
H 1.191381 1.840726 1.945085  
H 1.564964 1.282294 3.339369  
el energy= -2131.14542511  
zpe= -2130.835684  
th energy= -2130.807520  
th enthalpy= -2130.806575  
free energy= -2130.895222

P -2.498058 -0.213137 -0.199650  
O -3.006500 0.695880 1.017010  
O -1.421614 -1.214892 0.446072  
C -2.067847 1.422421 1.838369  
H -1.309539 0.758011 2.259437  
H -1.582572 2.204080 1.245719  
H -2.658057 1.875849 2.632132  
C -1.870836 -2.163607 1.436861  
H -2.552237 -2.881488 0.976360  
H -0.975003 -2.668697 1.789405  
H -2.367412 -1.642163 2.258062  
S -3.997282 -0.972739 -1.157398  
S -1.231148 0.929500 -1.419502  
C 0.386864 0.730167 -0.547807  
C 1.103153 2.060262 -0.704307  
O 0.956217 2.823387 0.382822  
C 1.562684 4.125774 0.307328  
C 1.178047 -0.419068 -1.149896  
C 2.347668 -0.841510 -0.221875  
O 2.988786 -1.898973 -0.870440  
C 4.143902 -2.375070 -0.177150  
O 1.710503 2.392682 -1.692031  
O 3.122921 0.273365 -0.088583  
H 0.196265 0.550670 0.510480  
H 1.343614 4.606397 1.257112  
H 2.638588 4.024156 0.161821  
H 1.129286 4.686682 -0.521132  
H 0.546159 -1.308472 -1.228552  
H 1.565820 -0.155538 -2.135393  
H 4.619733 -3.100170 -0.835162  
H 4.835740 -1.550474 0.020348  
H 3.864156 -2.854273 0.764540  
O 1.911357 -1.214535 1.047472  
H 1.415489 -2.061423 0.934543  
O 0.825582 -3.488410 0.139210  
H 0.907456 -4.324028 0.615057  
H 1.502688 -3.515403 -0.553467  
O 0.996597 0.902341 2.733342  
H 1.196241 1.674726 2.188553  
H 1.436737 0.167476 2.277171  
el energy= -2131.17045430  
zpe= -2130.858617  
th energy= -2130.830393  
th enthalpy= -2130.829449  
free energy= -2130.918763

TS14

P -2.562164 -0.190375 -0.252120  
O -3.003064 0.962586 0.764978  
O -1.612300 -1.161252 0.626919  
C -2.038982 1.849755 1.371257  
H -1.239890 1.286426 1.862035  
H -1.622282 2.513226 0.609438  
H -2.594630 2.432017 2.103508  
C -2.034022 -1.542152 1.959930  
H -3.076133 -1.867209 1.948585  
H -1.386714 -2.370283 2.242805

H -1.890054 -0.703981 2.641537  
S -4.101796 -0.990988 -1.101255  
S -1.167387 0.566527 -1.620240  
C 0.382174 0.535055 -0.621000  
C 1.019289 1.913521 -0.675734  
O 1.073574 2.475099 0.535979  
C 1.723362 3.756111 0.588222  
C 1.364154 -0.515583 -1.151867  
C 2.420283 -0.697208 -0.072717  
O 3.714769 -1.421902 -1.025803  
C 4.730832 -1.985184 -0.241642  
O 1.425984 2.433434 -1.685022  
O 3.152687 0.279055 0.250309  
H 0.119150 0.300267 0.410326  
H 1.667896 4.072009 1.626723  
H 2.761207 3.652074 0.268633  
H 1.205657 4.462356 -0.061245  
H 0.849790 -1.456681 -1.350417  
H 1.838462 -0.159433 -2.067791  
H 5.003269 -2.912909 -0.763810  
H 5.611866 -1.340193 -0.201847  
H 4.370542 -2.235448 0.759520  
O 2.115020 -1.582161 0.898093  
H 1.442737 -2.253945 0.595438  
O 0.190469 -3.252924 0.251348  
H -0.605927 -2.751060 0.019772  
H 0.297454 -3.933778 -0.423762  
O 0.714096 0.316402 2.590449  
H 1.165569 1.080641 2.205161  
H 1.249002 -0.439695 2.304418

el energy= -2131.15135951  
zpe= -2130.840987  
th energy= -2130.813167  
th enthalpy= -2130.812223  
free energy= -2130.900428

27

P 1.161017 -1.285399 0.171551  
O 0.814145 -2.548585 1.061338  
O 0.928067 0.019287 1.035497  
C -0.538411 -2.720954 1.572273  
H -0.895421 -1.799099 2.040882  
H -1.195327 -3.008895 0.749334  
H -0.468746 -3.524024 2.301560  
C 1.527989 0.181405 2.347300  
H 2.614230 0.153919 2.255626  
H 1.198265 1.164814 2.674677  
H 1.167162 -0.604173 3.012219  
S 3.067778 -1.552797 -0.398311  
S -0.191316 -1.051667 -1.383937  
C -1.234273 0.266300 -0.597026  
C -2.624364 0.158049 -1.200612  
O -3.376131 -0.697082 -0.499843  
C -4.706927 -0.899847 -1.001500  
C -0.625613 1.666526 -0.718749  
C -0.845649 2.372541 0.625499  
O 2.647468 0.631473 -1.216110

C 3.708896 0.938075 -2.108554  
O -3.007184 0.755574 -2.175177  
O -2.004370 2.308720 1.093270  
H -1.339967 -0.018541 0.447465  
H -5.169771 -1.615867 -0.327271  
H -5.253329 0.044009 -0.998628  
H -4.664346 -1.295900 -2.016804  
H 0.432871 1.620263 -0.971773  
H -1.145833 2.214654 -1.510063  
H 3.680979 0.230532 -2.937907  
H 3.559532 1.952109 -2.493560  
H 4.681839 0.883811 -1.611456  
O 0.141368 2.938343 1.178892  
H 1.508126 2.608453 0.747005  
O 2.494306 2.356918 0.536300  
H 2.943473 3.170045 0.275861  
H 2.630375 1.335922 -0.423726  
O -2.429056 -0.101703 2.404534  
H -3.049734 -0.459231 1.755711  
H -2.311824 0.823489 2.112148

el energy= -2131.16545439  
zpe= -2130.855477  
th energy= -2130.827423  
th enthalpy= -2130.826479  
free energy= -2130.915722

28

P -2.359096 -0.701241 -0.233543  
O -3.130765 0.317789 0.730112  
O -1.176281 -1.311774 0.687820  
C -2.489147 1.477792 1.301489  
H -1.607040 1.193767 1.882709  
H -2.209092 2.175226 0.507488  
H -3.234684 1.937003 1.947213  
C -1.503724 -1.753169 2.028457  
H -2.341964 -2.452364 1.999694  
H -0.610805 -2.253734 2.398497  
H -1.738545 -0.893300 2.655946  
S -3.586379 -1.954668 -1.042820  
S -1.238564 0.383815 -1.632149  
C 0.210113 0.845152 -0.593994  
C 0.542669 2.305932 -0.837432  
O 0.446258 3.013622 0.290915  
C 0.810548 4.399262 0.176513  
C 1.423310 -0.039938 -0.907530  
C 2.424090 0.206851 0.207448  
O 3.339300 -2.460044 -1.036169  
C 4.601498 -2.738378 -0.564504  
O 0.860277 2.763412 -1.907354  
O 3.000238 1.267850 0.315325  
H -0.058046 0.715512 0.453070  
H 0.667709 4.823952 1.166690  
H 1.853499 4.478606 -0.133384  
H 0.169747 4.893144 -0.554343  
H 1.117864 -1.082750 -0.955160  
H 1.866291 0.248890 -1.863174  
H 4.744401 -3.801627 -0.341349

H 5.387104 -2.345008 -1.219184  
H 4.666900 -2.189369 0.393917  
O 2.562696 -0.742035 1.129742  
H 1.988713 -1.547455 0.949770  
O 1.183702 -2.908655 0.650574  
H 0.302092 -2.742546 0.284826  
H 1.723218 -3.272290 -0.070468  
O 0.599861 0.980911 2.542653  
H 0.940251 1.793800 2.143465  
H 1.359489 0.383179 2.564814  
el energy= -2131.17559136  
zpe= -2130.866549  
th energy= -2130.836973  
th enthalpy= -2130.836029  
free energy= -2130.929883

29

P 2.060919 -0.770868 0.104558  
O 1.920460 -1.286362 1.616276  
O 1.615111 0.760006 0.108277  
C 0.690702 -1.058542 2.335488  
H 0.464349 0.010762 2.362462  
H -0.120873 -1.620123 1.859492  
H 0.856643 -1.442105 3.340471  
C 2.439524 1.804275 0.663286  
H 3.481542 1.649767 0.374619  
H 2.056781 2.723823 0.221272  
H 2.320902 1.815489 1.746564  
S 3.809897 -1.227245 -0.595552  
S 0.472282 -1.561769 -1.011888  
C -0.824498 -0.241404 -0.849430  
C -2.135459 -1.008759 -0.918674  
O -2.494790 -1.463211 0.289276  
C -3.740941 -2.175369 0.329926  
C -0.705309 0.841248 -1.932705  
C -0.197412 2.178219 -1.367897  
O 0.734055 2.760003 -1.921931  
O -2.766428 -1.208015 -1.926288  
O -0.834980 2.609047 -0.333197  
H -0.741888 0.197199 0.150120  
H -3.885508 -2.459651 1.369493  
H -4.546989 -1.522140 -0.007756  
H -3.689378 -3.057806 -0.308533  
H -0.057744 0.516697 -2.746632  
H -1.704676 1.016738 -2.346269  
O -3.033105 1.443545 -0.013332  
H -2.140696 1.992373 -0.143761  
O -0.124012 2.164758 2.326841  
H -0.902087 1.607711 2.507146  
H -0.222837 2.386886 1.382543  
O -2.362824 0.459790 2.473655  
H -2.784765 0.863622 1.687763  
H -2.198956 -0.446484 2.185093  
el energy= -2091.42582338  
zpe= -2091.156629  
th energy= -2091.130700  
th enthalpy= -2091.129756

free energy= -2091.212986

TS15

P 2.213070 -0.594388 0.044944  
O 2.140741 -0.829122 1.630964  
O 1.772464 0.926907 -0.188058  
C 0.924968 -0.549536 2.358458  
H 0.620901 0.490493 2.204334  
H 0.135091 -1.236673 2.036958  
H 1.159538 -0.727716 3.406364  
C 2.525733 1.996527 0.413449  
H 3.579392 1.911481 0.136722  
H 2.096232 2.909846 0.006950  
H 2.403387 1.972389 1.497300  
S 3.948273 -1.155684 -0.622554  
S 0.609990 -1.557897 -0.875088  
C -0.739210 -0.297530 -0.669104  
C -2.013419 -1.148347 -0.631654  
O -2.147036 -1.673426 0.641220  
C -3.242544 -2.576980 0.775069  
C -0.727984 0.734496 -1.811744  
C -0.917183 2.140414 -1.255549  
O -0.046607 2.995316 -1.343293  
O -2.432182 -1.732308 -1.622307  
O -2.042778 2.368148 -0.627248  
H -0.600063 0.194231 0.295366  
H -3.267337 -2.873461 1.822519  
H -4.171571 -2.072007 0.499408  
H -3.097163 -3.449576 0.136285  
H 0.223656 0.721662 -2.338741  
H -1.529670 0.483531 -2.514064  
O -3.256158 0.276151 -0.365781  
H -2.642227 1.463713 -0.569420  
O -0.206860 2.496011 1.702899  
H -1.056577 2.020893 1.743030  
H -0.206135 2.932528 0.840497  
O -2.420417 0.780269 2.115790  
H -3.231419 1.060695 1.670718  
H -2.295812 -0.126757 1.786860  
el energy= -2091.40737389  
zpe= -2091.138231  
th energy= -2091.113340  
th enthalpy= -2091.112396  
free energy= -2091.192215

30

P 2.256172 -0.521301 0.000140  
O 2.221439 -0.839811 1.573376  
O 1.785691 1.004938 -0.133880  
C 1.007153 -0.653731 2.332186  
H 0.658978 0.381025 2.247497  
H 0.239652 -1.348848 1.974953  
H 1.264097 -0.886959 3.363896  
C 2.480057 2.043693 0.579726  
H 3.541442 2.030519 0.320562  
H 2.019781 2.973969 0.252731  
H 2.340945 1.915975 1.654362



S 3.991355 -1.000077 -0.728789  
S 0.650226 -1.472006 -0.932376  
C -0.687354 -0.228725 -0.651892  
C -2.043368 -0.968357 -0.573086  
O -1.950491 -1.794908 0.576638  
C -3.159262 -2.479057 0.882827  
C -0.681556 0.839933 -1.759808  
C -1.124033 2.170960 -1.175028  
O -0.389754 3.146845 -1.134382  
O -2.285727 -1.716699 -1.707434  
O -2.326836 2.186423 -0.648818  
H -0.514449 0.241823 0.319004  
H -2.913742 -3.218821 1.645088  
H -3.913180 -1.788114 1.272043  
H -3.553903 -2.981033 -0.004069  
H 0.317965 0.976223 -2.165286  
H -1.360390 0.525502 -2.559488  
O -3.101472 -0.134647 -0.556148  
H -2.736342 1.205456 -0.687404  
O -0.362168 2.334166 1.788864  
H -1.216684 1.865582 1.841033  
H -0.398743 2.850772 0.972522  
O -2.538510 0.574936 2.103420  
H -2.983145 0.458098 1.242883  
H -2.067356 -0.266561 2.183562  
el energy= -2091.43794397  
zpe= -2091.166613  
th energy= -2091.141786  
th enthalpy= -2091.140842  
free energy= -2091.220689

TS16

P 2.208710 -0.561337 0.012651  
O 2.129491 -0.932589 1.574154  
O 1.773085 0.979926 -0.071231  
C 0.899481 -0.736194 2.303098  
H 0.571658 0.306158 2.225078  
H 0.130784 -1.414110 1.915496  
H 1.123877 -0.987725 3.338196  
C 2.486154 1.975653 0.683803  
H 3.551651 1.934294 0.445249  
H 2.063207 2.929066 0.373249  
H 2.320760 1.822920 1.751454  
S 3.957549 -1.043553 -0.683941  
S 0.614771 -1.460757 -0.989326  
C -0.691081 -0.186371 -0.748247  
C -2.077091 -0.857019 -0.838352  
O -1.994211 -1.873736 0.595029  
C -3.262443 -2.377883 0.938480  
C -0.572318 0.953214 -1.787528  
C -0.982705 2.265134 -1.140225  
O -0.229351 3.219877 -1.048163  
O -2.173859 -1.959218 -1.523593  
O -2.192054 2.291124 -0.618768  
H -0.585804 0.231128 0.255910  
H -3.313372 -2.375231 2.034869  
H -4.059060 -1.733608 0.549969

H -3.399418 -3.404192 0.587414  
H 0.453459 1.065028 -2.128961  
H -1.214800 0.741842 -2.649042  
O -3.065456 -0.032567 -0.742482  
H -2.636083 1.350796 -0.711314  
O -0.359866 2.322775 1.847959  
H -1.230795 1.884060 1.832812  
H -0.342055 2.883496 1.060985  
O -2.573008 0.588949 1.985158  
H -2.949415 0.430968 1.099488  
H -2.090539 -0.231394 2.150969  
el energy= -2091.42047458  
zpe= -2091.150523  
th energy= -2091.125911  
th enthalpy= -2091.124967  
free energy= -2091.203602

31

P -2.321479 0.053502 -0.221617  
O -2.319329 1.481611 0.508793  
O -1.728669 -0.969252 0.868953  
C -1.078358 2.048307 0.988058  
H -0.576955 1.350894 1.667143  
H -0.431543 2.294054 0.144152  
H -1.350197 2.963597 1.510853  
C -2.352765 -1.014308 2.168694  
H -3.427331 -1.180748 2.061690  
H -1.895604 -1.850811 2.692874  
H -2.151308 -0.087950 2.707290  
S -4.096572 -0.322223 -0.919244  
S -0.830875 0.028380 -1.681792  
C 0.659546 -0.487880 -0.736639  
C 1.917349 0.016871 -1.493692  
O 1.689340 3.388220 0.708809  
C 1.987082 3.209472 -0.659256  
C 0.730164 -2.021788 -0.671708  
C 1.894920 -2.440488 0.210067  
O 2.785617 -3.120882 -0.474519  
O 1.800498 0.316955 -2.685871  
O 2.006174 -2.226741 1.399072  
H 0.617400 -0.086577 0.279938  
H 1.992766 4.189453 -1.144605  
H 2.965269 2.736926 -0.810466  
H 1.240934 2.584422 -1.175948  
H -0.165206 -2.435752 -0.199640  
H 0.829301 -2.437684 -1.678403  
O 2.974359 -0.017894 -0.795256  
H 2.818400 0.512349 0.676381  
O 0.520785 -0.230816 2.820125  
H 1.326255 0.229669 2.513843  
H 0.635143 -1.101972 2.415924  
O 2.667223 0.974515 1.561492  
H 3.525405 1.018405 1.998306  
H 1.992989 2.573849 1.155561  
el energy= -2091.42935798  
zpe= -2091.160835  
th energy= -2091.133927

th enthalpy= -2091.132983  
free energy= -2091.219379

32

P 2.175701 -0.656208 -0.038172  
O 2.022803 -1.288041 1.430182  
O 1.811042 0.894246 0.140774  
C 0.782875 -1.132589 2.154117  
H 0.489315 -0.078096 2.193481  
H 0.003271 -1.734623 1.678292  
H 0.976009 -1.509469 3.157209  
C 2.542734 1.708364 1.074598  
H 3.614349 1.638447 0.873069  
H 2.188494 2.723705 0.907292  
H 2.318233 1.395690 2.095570  
S 3.927910 -1.094353 -0.756222  
S 0.580780 -1.294830 -1.230467  
C -0.649517 0.031458 -0.910428  
C -2.056353 -0.498663 -1.264189  
O -2.240097 -2.270866 0.994795  
C -3.575123 -2.521614 0.749202  
C -0.344917 1.335446 -1.689078  
C -0.734472 2.531615 -0.838293  
O 0.059462 3.395807 -0.507020  
O -2.201275 -1.634287 -1.709097  
O -1.985198 2.551383 -0.423446  
H -0.640919 0.246077 0.163520  
H -4.023306 -2.682352 1.746243  
H -4.070954 -1.647096 0.308251  
H -3.732350 -3.419828 0.145150  
H 0.714329 1.424463 -1.913901  
H -0.910174 1.350390 -2.626895  
O -2.991057 0.357695 -1.047991  
H -2.474620 1.684381 -0.734029  
O -0.345678 1.996379 2.150532  
H -1.224789 1.603339 1.990788  
H -0.245416 2.685735 1.480928  
O -2.655457 0.446629 1.791245  
H -3.007935 0.543452 0.890645  
H -2.335806 -0.469826 1.788615

el energy= -2091.45002793

zpe= -2091.180639

th energy= -2091.154601

th enthalpy= -2091.153657

free energy= -2091.236633

33

P 0.763617 -1.271638 -0.516664  
O 1.871892 -0.212820 -0.963480  
O -0.086899 -1.389032 -1.870818  
C 1.695568 0.734513 -2.041140  
H 0.651599 1.031133 -2.147575  
H 2.298892 1.601035 -1.772617  
H 2.043976 0.274771 -2.966726  
C -1.274996 -2.209464 -1.901334  
H -1.048993 -3.202649 -1.504323  
H -2.074892 -1.724272 -1.332658

H -1.549133 -2.289927 -2.952101  
S 1.563133 -2.927160 0.141101  
S -0.480697 -0.443652 0.920497  
C -1.257032 0.945279 -0.005085  
C -0.368796 2.197860 -0.175966  
O -0.815343 3.039857 -0.965459  
C -2.566572 1.281334 0.705423  
C -3.670056 0.207239 0.516990  
O -4.499353 0.106644 1.446750  
O 0.712939 2.291342 0.485210  
O -3.652838 -0.423078 -0.570972  
H -1.529358 0.565908 -0.994148  
H -2.408227 1.469722 1.772105  
H -2.927765 2.214756 0.257850  
O 2.674934 0.860524 1.341159  
H 1.801585 1.292912 1.047834  
O 3.145868 3.254659 -0.348107  
H 3.472840 2.481500 0.132774  
H 2.190388 3.193693 -0.154736  
O 2.009192 -1.311720 3.156055  
H 2.227985 -0.555551 2.586246  
H 1.846018 -2.017048 2.516442

el energy= -2051.66267239

zpe= -2051.435568

th energy= -2051.410644

th enthalpy= -2051.409700

free energy= -2051.491633

TS17

P -1.456738 -0.978053 0.060963  
O -1.921705 -0.120978 1.339093  
O -0.406051 -1.887224 0.931635  
C -1.150975 1.006204 1.798342  
H -0.140195 0.698293 2.074366  
H -1.118659 1.785921 1.031356  
H -1.675431 1.383617 2.675010  
C 0.425772 -2.869832 0.307282  
H 0.283158 -2.896269 -0.778669  
H 1.467647 -2.623833 0.538775  
H 0.162055 -3.848980 0.711907  
S -2.779039 -2.163534 -0.773592  
S 0.010268 -0.074503 -1.249668  
C 1.475019 0.209671 -0.181958  
C 1.669792 1.726028 0.113030  
O 2.010446 2.001271 1.273769  
C 2.683304 -0.360507 -0.927810  
C 3.818759 -0.662834 0.106808  
O 4.942779 -0.195639 -0.160311  
O 1.499071 2.495929 -0.869152  
O 3.474803 -1.369764 1.083736  
H 1.324859 -0.356411 0.737007  
H 2.434122 -1.316060 -1.404924  
H 3.020502 0.339340 -1.695219  
O -2.125424 0.735115 -0.967622  
H -2.455494 0.472059 -1.843011  
O -1.113604 3.408496 -0.724806  
H -1.531045 2.562725 -0.950619

H -0.160482 3.205030 -0.795593  
O -4.059366 1.722444 0.875664  
H -3.446031 1.506451 0.154113  
H -3.951205 0.957938 1.452992  
el energy= -2051.63612520  
zpe= -2051.408474  
th energy= -2051.384203  
th enthalpy= -2051.383259  
free energy= -2051.463924

37

P -1.104796 -1.102427 -0.047638  
O -1.902410 -0.685310 1.328457  
O 0.102088 -1.799176 0.921303  
C -1.803679 0.658197 1.798474  
H -0.792551 0.858382 2.165629  
H -2.042156 1.379859 1.012461  
H -2.519062 0.755437 2.616435  
C 1.142299 -2.554540 0.328838  
H 1.265297 -2.329016 -0.738409  
H 2.078130 -2.298789 0.835820  
H 0.932082 -3.626113 0.421833  
S -1.750181 -2.770196 -1.008479  
S 0.279755 0.403028 -0.817119  
C 1.778725 0.305543 0.042710  
C 0.354568 3.429047 0.241748  
O 0.019558 3.194477 1.329246  
C 3.088991 0.259578 -0.656631  
C 4.223666 -0.452517 0.144981  
O 5.286878 -0.620853 -0.494561  
O 0.724780 3.702187 -0.828557  
O 3.982444 -0.769948 1.333708  
H 1.758163 0.203816 1.120225  
H 2.993854 -0.231785 -1.633096  
H 3.463047 1.272242 -0.881073  
O -2.263852 -0.037610 -0.970527  
H -2.538144 -0.552645 -1.741544  
O -2.066858 2.753533 -1.134865  
H -2.158674 1.780434 -1.111315  
H -1.305616 2.888660 -1.710594  
O -4.595441 -0.100096 0.625698  
H -3.853797 0.014447 0.003365  
H -4.186739 -0.673322 1.284460  
el energy= -2051.66959669  
zpe= -2051.445019  
th energy= -2051.419448  
th enthalpy= -2051.418504  
free energy= -2051.503079

38

P -1.728764 -0.195621 0.886927  
O -2.870754 -1.295615 0.612072  
O -2.401145 1.069724 0.191340  
C -4.252670 -0.944348 0.854559  
H -4.582609 -0.239777 0.091480  
H -4.810309 -1.876104 0.786694  
H -4.364377 -0.517051 1.853368

C -2.092956 2.445836 0.475579  
H -3.042476 2.948958 0.655720  
H -1.454469 2.525395 1.357336  
H -1.594163 2.846351 -0.405430  
S -1.141901 0.064752 2.715191  
S -0.347933 -1.083447 -0.426330  
C 1.237212 -0.362044 0.139683  
C 1.421080 0.984432 -0.536382  
O 0.955433 1.977259 0.209302  
C 1.073389 3.286052 -0.372483  
C 2.359082 -1.311708 -0.255966  
C 3.684321 -0.742639 0.198053  
O 4.691484 -1.566784 -0.077920  
C 5.991849 -1.102951 0.311227  
O 1.905983 1.119083 -1.638143  
O 3.814555 0.330651 0.743676  
H 1.194073 -0.231409 1.223382  
H 0.657302 3.972158 0.362118  
H 2.124516 3.512000 -0.557012  
H 0.509183 3.318981 -1.305387  
H 2.217496 -2.296013 0.196539  
H 2.396305 -1.442564 -1.341579  
H 6.685647 -1.885826 0.014966  
H 6.225088 -0.167933 -0.200106  
H 6.026761 -0.945794 1.390174  
O -3.131297 -0.240872 -2.141237  
H -2.956303 -1.217956 -2.050887  
O -0.937297 1.691295 -2.343469  
H -1.604889 0.990888 -2.247410  
H -0.121177 1.233521 -2.577980  
O -2.738929 -2.908771 -1.712143  
H -1.929800 -3.306944 -2.055354  
H -2.639110 -2.910986 -0.749736  
el energy= -2131.16691779  
zpe= -2130.857619  
th energy= -2130.828234  
th enthalpy= -2130.827290  
free energy= -2130.918973

TS21

P -1.876301 -0.234890 0.664939  
O -3.309089 -0.930140 0.446675  
O -1.913925 1.305934 0.187788  
C -4.242552 -0.458326 -0.551763  
H -4.003134 0.561814 -0.851159  
H -4.217220 -1.124516 -1.413995  
H -5.222316 -0.492321 -0.077693  
C -1.975714 2.398558 1.120681  
H -1.103137 2.392046 1.773464  
H -1.984344 3.292067 0.496887  
H -2.888227 2.341829 1.714951  
S -1.527114 -0.298549 2.616596  
S -0.263685 -1.541305 -0.091466  
C 1.218670 -0.538651 0.280895  
C 1.175461 0.804605 -0.439423  
O 0.952566 1.798134 0.404440  
C 0.955807 3.114929 -0.175449

C 2.430266 -1.345533 -0.181465  
C 3.703612 -0.592412 0.133025  
O 4.777435 -1.353546 -0.050376  
C 6.037740 -0.710057 0.188799  
O 1.340220 0.922242 -1.632563  
O 3.739117 0.563941 0.490236  
H 1.223662 -0.372936 1.361427  
H 0.796760 3.799469 0.654702  
H 1.922653 3.300253 -0.646773  
H 0.154493 3.189077 -0.912850  
H 2.461273 -2.326036 0.298975  
H 2.388128 -1.502373 -1.264074  
H 6.795827 -1.462758 -0.012487  
H 6.155088 0.143952 -0.479649  
H 6.095005 -0.372848 1.224603  
O -1.624858 -0.361083 -1.400704  
H -2.012086 -1.204403 -1.730692  
O -1.122753 2.233087 -2.576772  
H -1.516942 1.539595 -2.025053  
H -0.212606 1.919240 -2.663136  
O -2.679380 -2.919197 -1.568483  
H -2.132773 -3.678320 -1.804046  
H -2.997193 -3.095480 -0.673294  
el energy= -2131.13854688  
zpe= -2130.827597  
th energy= -2130.799450  
th enthalpy= -2130.798506  
free energy= -2130.887175

39  
P -2.639626 0.029387 -0.434246  
O -4.122873 -0.081598 -1.015418  
O -2.199131 -1.467126 -0.107968  
C -5.117359 -0.775024 -0.230539  
H -4.862413 -1.833941 -0.153458  
H -5.184156 -0.330584 0.763891  
H -6.058641 -0.653363 -0.761438  
C -2.070876 -2.378068 -1.216543  
H -1.108933 -2.215135 -1.706746  
H -2.122475 -3.380502 -0.795771  
H -2.888840 -2.237066 -1.927957  
S -1.534356 1.026038 -1.712492  
S 0.429411 1.809334 0.422791  
C 1.676164 0.620593 -0.170864  
C 1.520298 -0.651295 0.632411  
O 0.810798 -1.576257 -0.000210  
C 0.573708 -2.780548 0.748903  
C 3.074910 1.198357 0.018427  
C 4.121113 0.207546 -0.437849  
O 5.345203 0.731451 -0.396864  
C 6.405802 -0.147629 -0.794500  
O 1.953367 -0.781499 1.761184  
O 3.883292 -0.926757 -0.790114  
H 1.475970 0.417896 -1.225255  
H 0.127773 -3.481975 0.047972  
H 1.518224 -3.172063 1.128443  
H -0.104459 -2.558789 1.574556

H 3.190450 2.130273 -0.539384  
H 3.256748 1.419603 1.075002  
H 7.321830 0.429616 -0.694699  
H 6.430796 -1.024325 -0.145573  
H 6.262812 -0.465654 -1.828284  
O -2.720114 0.612778 1.024423  
H -2.624140 1.638542 1.038228  
O -0.800064 -0.679179 2.908252  
H -1.237088 -0.181082 2.203263  
H 0.144160 -0.532677 2.765234  
O -2.405622 3.110357 0.873670  
H -2.137881 3.265115 -0.045079  
H -3.187640 3.658417 1.023667  
el energy= -2131.23865486  
zpe= -2130.928049  
th energy= -2130.898821  
th enthalpy= -2130.897877  
free energy= -2130.991103

41  
H 1.420688 2.816409 -0.368964  
S 2.133961 1.766444 -0.816558  
C 0.787981 0.579867 -0.423199  
C 1.398330 -0.807348 -0.340618  
O 1.915435 -1.035140 0.869583  
C 2.482766 -2.338248 1.054614  
C -0.340375 0.632171 -1.459057  
C -1.612151 0.093306 -0.849856  
O -1.960005 -1.095689 -1.306867  
C -3.098289 -1.695527 -0.672734  
O 1.432514 -1.598704 -1.252107  
O -2.250643 0.700329 -0.003891  
H 0.417207 0.852773 0.564423  
H 2.844910 -2.360216 2.079663  
H 1.715071 -3.098363 0.901077  
H 3.302913 -2.496191 0.352831  
H -0.526855 1.673306 -1.728652  
H -0.058027 0.066811 -2.347358  
H -3.241781 -2.652390 -1.168165  
H -2.887805 -1.837856 0.389403  
H -3.975912 -1.059666 -0.793722  
O -0.596902 -1.592919 1.315324  
H -0.627882 -0.796499 1.901334  
O -0.620660 3.088348 0.669756  
H -0.505428 2.662302 1.532244  
H -1.346010 2.570746 0.288933  
O -1.065437 0.881180 2.487862  
H -1.878243 0.893047 1.958171  
H -1.340212 0.938129 3.411515  
el energy= -1162.04627974  
zpe= -1161.818986  
th energy= -1161.798539  
th enthalpy= -1161.797594  
free energy= -1161.867733

TS22  
H 1.673019 2.803829 -0.690560

S 2.072990 1.609382 -1.152772  
 C 0.653093 0.686653 -0.451910  
 C 1.121927 -0.752547 -0.263399  
 O 1.945741 -0.775317 0.965099  
 C 2.794569 -1.909999 1.104454  
 C -0.554893 0.736475 -1.395808  
 C -1.759008 0.106198 -0.739575  
 O -2.093307 -1.060060 -1.265680  
 C -3.153630 -1.762780 -0.600713  
 O 1.424451 -1.463445 -1.211252  
 O -2.351928 0.606116 0.203868  
 H 0.404754 1.144207 0.504388  
 H 2.722695 -2.256850 2.134095  
 H 2.511589 -2.681593 0.390218  
 H 3.813278 -1.568613 0.896506  
 H -0.797234 1.782054 -1.599628  
 H -0.314201 0.223834 -2.327627  
 H -3.300018 -2.678884 -1.167002  
 H -2.854932 -1.986778 0.425330  
 H -4.061680 -1.159260 -0.596227  
 O 0.053385 -1.454548 0.757026  
 H -0.232780 -0.806243 1.460882  
 O -0.892479 2.955329 1.148974  
 H -0.664147 2.433189 1.930730  
 H -1.570906 2.401242 0.734003  
 O -0.884620 0.376564 2.503992  
 H -1.799410 0.386902 2.182698  
 H -0.920157 0.111746 3.432046  
 el energy= -1162.01019358  
 zpe= -1161.783633  
 th energy= -1161.764014  
 th enthalpy= -1161.763070  
 free energy= -1161.832325

42

H -1.254470 -2.246582 2.258517  
 S -1.819807 -1.950284 1.078522  
 C -0.508580 -0.785584 0.545930  
 C -0.954317 -0.103699 -0.781537  
 O -2.125798 0.611999 -0.504166  
 C -2.724106 1.185290 -1.668837  
 C 0.845027 -1.480476 0.381656  
 C 1.958505 -0.488609 0.129146  
 O 2.696894 -0.813545 -0.924593  
 C 3.752442 0.102170 -1.243592  
 O -1.156487 -1.123101 -1.671006  
 O 2.182438 0.483423 0.824311  
 H -0.430320 0.019516 1.284727  
 H -3.648867 1.655622 -1.338880  
 H -2.064843 1.933396 -2.117246  
 H -2.950251 0.406011 -2.402329  
 H 1.089867 -1.994868 1.316099  
 H 0.809965 -2.220292 -0.418513  
 H 4.253095 -0.314951 -2.113904  
 H 3.331593 1.082672 -1.473642  
 H 4.444312 0.190302 -0.405006  
 O 0.040461 0.719719 -1.290601

H 0.068835 1.515268 -0.715880  
 O 0.430513 1.395015 2.901533  
 H 0.067609 2.043504 2.278221  
 H 1.170461 1.027792 2.393918  
 O -0.557705 2.673039 0.558383  
 H -0.598641 3.618018 0.366527  
 H -1.467783 2.342192 0.503535  
 el energy= -1162.05064254  
 zpe= -1161.821164  
 th energy= -1161.801826  
 th enthalpy= -1161.800882  
 free energy= -1161.869148

TS23

H 1.479430 3.026597 -0.021540  
 S 1.975257 1.970531 -0.684597  
 C 0.605987 0.846513 -0.233362  
 C 1.002610 -0.582470 -0.607043  
 O 2.412432 -0.823767 0.409927  
 C 2.805889 -2.166911 0.505026  
 C -0.675693 1.226093 -1.000351  
 C -1.868663 0.436225 -0.517535  
 O -2.444221 -0.274598 -1.473410  
 C -3.548613 -1.093188 -1.061282  
 O 1.664613 -0.801468 -1.656783  
 O -2.266251 0.449903 0.635545  
 H 0.428922 0.914985 0.842631  
 H 3.657210 -2.383484 -0.144828  
 H 3.125442 -2.289271 1.548948  
 H 1.971839 -2.845230 0.307657  
 H -0.895109 2.281336 -0.815218  
 H -0.532494 1.083108 -2.072828  
 H -3.900500 -1.588364 -1.962611  
 H -3.208499 -1.825394 -0.326568  
 H -4.334285 -0.474784 -0.626114  
 O 0.111453 -1.517651 -0.220102  
 H -0.194267 -1.346922 0.708638  
 O -0.643848 1.792389 2.647592  
 H -0.498102 0.883785 2.947639  
 H -1.342291 1.662345 1.988741  
 O -0.712544 -1.057653 2.286445  
 H -1.666473 -0.946731 2.157909  
 H -0.597113 -1.815277 2.874662  
 el energy= -1162.03069904  
 zpe= -1161.804626  
 th energy= -1161.784702  
 th enthalpy= -1161.783758  
 free energy= -1161.854368

43

H 1.841162 0.011516 -2.374546  
 S 1.661442 -0.965465 -1.467204  
 C 0.195571 -0.280023 -0.649084  
 C 0.186060 -0.884633 0.788668  
 O 2.954577 0.414344 -0.051007  
 C 3.590896 -0.419391 0.919513  
 C -1.105120 -0.663606 -1.372672

C -2.235730 -0.055413 -0.566243  
 O -2.946161 -0.976794 0.070392  
 C -3.944230 -0.471406 0.968872  
 O 0.632939 -2.032688 0.900576  
 O -2.446628 1.136571 -0.479465  
 H 0.291363 0.807136 -0.662594  
 H 4.335987 -1.021712 0.400497  
 H 4.087240 0.216353 1.658101  
 H 2.867252 -1.072306 1.416166  
 H -1.127936 -0.236087 -2.377787  
 H -1.217943 -1.747383 -1.425148  
 H -4.420432 -1.346885 1.403119  
 H -3.463761 0.132237 1.740408  
 H -4.670113 0.134067 0.425123  
 O -0.318936 -0.131927 1.665693  
 H 0.555108 1.223111 1.559878  
 O -0.225794 2.976434 -0.929742  
 H 0.240203 2.874543 -0.085017  
 H -1.069665 2.520211 -0.791812  
 O 1.241870 1.895741 1.268598  
 H 1.593598 2.320590 2.060387  
 H 2.315238 1.025448 0.433810  
 el energy= -1162.04761940  
 zpe= -1161.819098  
 th energy= -1161.799447  
 th enthalpy= -1161.798503  
 free energy= -1161.868445

44

H 3.221865 -2.681380 -0.091888  
 S 3.294744 -1.413239 0.345156  
 C 1.733801 -0.846314 -0.415269  
 C 1.651803 0.699402 -0.326868  
 O 2.211665 1.249180 0.645161  
 C 0.508332 -1.457515 0.299319  
 C -0.736790 -0.797215 -0.233780  
 O -1.106957 0.232242 0.529501  
 C -1.949333 1.247139 -0.047468  
 O 0.953383 1.227869 -1.229738  
 O -1.312554 -1.137458 -1.250552  
 H 1.717823 -1.133838 -1.467478  
 H 0.453609 -2.531298 0.110998  
 H 0.587646 -1.270908 1.371722  
 H -1.490169 2.195731 0.230455  
 H -1.966741 1.142941 -1.132640  
 H -2.951750 1.149194 0.372272  
 O -4.026415 -0.708789 -1.066762  
 H -3.088098 -0.907734 -1.312966  
 O -3.686307 -0.724062 1.831931  
 H -2.726118 -0.638593 1.862519  
 H -3.879836 -0.876387 0.893812  
 O 0.527084 3.508864 0.251664  
 H 1.145861 3.008705 0.807771  
 H 0.533951 2.899641 -0.512321  
 el energy= -1122.28882539  
 zpe= -1122.103982  
 th energy= -1122.085018

th enthalpy= -1122.084074  
 free energy= -1122.153060

TS24

H -3.179602 -2.419472 -0.112819  
 S -3.098386 -1.171134 -0.602697  
 C -1.632648 -0.663263 0.365310  
 C -1.467147 0.873322 0.256918  
 O -1.795122 1.400825 -0.830428  
 C -0.363080 -1.363420 -0.152437  
 C 0.848742 -0.766310 0.530190  
 O 1.311812 0.293321 -0.141625  
 C 2.222638 1.140183 0.563006  
 O -0.951699 1.416881 1.264387  
 O 1.057712 -0.909868 1.769741  
 H -1.785860 -0.922241 1.413930  
 H -0.398039 -2.430973 0.068352  
 H -0.267467 -1.216217 -1.230245  
 H 2.376622 2.000127 -0.083667  
 H 1.770883 1.455511 1.504138  
 H 3.162104 0.612182 0.744892  
 O 2.082962 -2.099864 0.257483  
 H 2.731061 -2.006297 0.980913  
 O 3.423984 -0.533284 -1.865843  
 H 2.701752 0.082815 -2.033013  
 H 3.029420 -1.128475 -1.211153  
 O 0.157123 3.379564 -0.368250  
 H -0.491289 2.910235 -0.919204  
 H -0.020616 2.897255 0.459391  
 el energy= -1122.26475912  
 zpe= -1122.080507  
 th energy= -1122.062109  
 th enthalpy= -1122.061165  
 free energy= -1122.127729

45

H -2.777059 -2.614219 0.341103  
 S -2.832268 -1.428242 -0.288383  
 C -1.394782 -0.682792 0.564293  
 C -1.332070 0.822176 0.216541  
 O -1.839672 1.197033 -0.861729  
 C -0.090309 -1.394991 0.188401  
 C 1.140454 -0.609665 0.632578  
 O 1.412041 0.338292 -0.363580  
 C 2.213600 1.449369 0.021712  
 O -0.732839 1.526176 1.073923  
 O 1.025344 -0.050520 1.887144  
 H -1.545741 -0.760531 1.641837  
 H -0.053379 -2.375497 0.671336  
 H -0.018165 -1.541239 -0.891970  
 H 2.304962 2.072466 -0.865961  
 H 1.721324 2.011117 0.815492  
 H 3.211203 1.132709 0.349086  
 O 2.207370 -1.520702 0.777535  
 H 2.992426 -1.028875 1.063336  
 O 2.226261 -1.778566 -2.147954  
 H 2.006757 -0.869975 -1.895992

H 2.438238 -2.161862 -1.286551  
O -0.196712 3.482247 -0.846605  
H -0.836359 2.871064 -1.248293  
H -0.163623 3.060459 0.029673  
el energy= -1122.29110645  
zpe= -1122.103559  
th energy= -1122.085737  
th enthalpy= -1122.084793  
free energy= -1122.149269

TS25

H -1.958530 -2.570078 1.153604  
S -2.569476 -1.830682 0.215221  
C -1.352741 -0.457299 0.256691  
C -1.994630 0.697744 -0.517291  
O -1.817249 1.913663 -0.046428  
C -0.014738 -0.859206 -0.380804  
C 0.998752 0.264323 -0.170801  
O 2.301040 -0.346470 -1.216902  
C 3.505718 0.313000 -0.930136  
O -2.635822 0.493307 -1.528946  
O 0.930034 1.276357 -0.999331  
H -1.190550 -0.167261 1.297665  
H 0.360926 -1.759937 0.110963  
H -0.158725 -1.054096 -1.446125  
H 4.297383 -0.448121 -0.946581  
H 3.743292 1.077537 -1.676684  
H 3.475488 0.755985 0.072105  
O 1.424429 0.414256 1.035256  
H 0.527178 1.514906 1.670065  
O 2.700432 -2.054952 1.122272  
H 2.282589 -1.195586 1.326897  
H 2.708115 -2.024281 0.157214  
O -0.242557 2.107945 1.953030  
H -1.208786 1.966728 0.771565  
H 0.096599 3.010909 1.968203  
el energy= -1122.28567305  
zpe= -1122.100452  
th energy= -1122.083693  
th enthalpy= -1122.082748  
free energy= -1122.145340

46

H 1.239571 -1.864660 0.736522  
S 0.052209 -2.332692 0.290894  
C -0.689030 -0.650005 0.166123  
C -2.028775 -0.794656 -0.518069  
O -3.107101 -0.972967 0.013299  
C 0.232339 0.323061 -0.558329  
C -0.303918 1.759265 -0.464282  
O 3.053699 -0.751895 0.921549  
C 3.623828 -1.211491 -0.288918  
O -1.983444 -0.802055 -1.839373  
O -1.552455 1.886133 -0.394026  
H -0.927537 -0.290524 1.169861  
H 1.228545 0.266703 -0.124292  
H 0.328709 0.044980 -1.615607

H 3.682057 -2.301722 -0.244063  
H 3.012534 -0.938771 -1.160740  
H 4.636729 -0.818583 -0.439857  
O 0.541933 2.688428 -0.481393  
H 2.068285 2.219284 -0.055465  
O 2.973291 1.899499 0.222572  
H 3.502996 1.926662 -0.582265  
H 3.014006 0.226096 0.842517  
O -2.694765 1.109743 2.041623  
H -3.137643 0.323914 1.696189  
H -2.339527 1.517564 1.229744  
el energy= -1122.29971982  
zpe= -1122.114754  
th energy= -1122.095637  
th enthalpy= -1122.094693  
free energy= -1122.165512

47

H 0.004306 -2.584501 0.830272  
S -1.181141 -2.464680 0.199749  
C -1.034897 -0.642203 0.128477  
C -2.369249 -0.078968 -0.344845  
O -2.582799 1.213076 -0.143847  
C 0.100954 -0.163074 -0.801995  
C 0.663021 1.179742 -0.312432  
O 3.375193 -1.105600 -0.778533  
C 3.733003 0.211772 -0.612369  
O -3.190754 -0.753696 -0.927769  
O 0.637691 2.161470 -1.072568  
H -0.823667 -0.284496 1.139520  
H 0.908514 -0.899145 -0.756387  
H -0.242612 -0.089270 -1.836506  
H 3.597269 0.572237 0.412940  
H 4.743430 0.400869 -0.997206  
H 3.045436 0.792717 -1.258780  
O 1.080793 1.182564 0.894546  
H -0.221899 2.333473 1.461961  
O 1.707289 -1.394776 1.625419  
H 1.465496 -0.453308 1.477864  
H 2.330990 -1.568446 0.905498  
O -1.013549 2.843992 1.187089  
H -1.912644 1.709529 0.412926  
H -0.664266 3.285371 0.396193  
el energy= -1122.31335383  
zpe= -1122.129016  
th energy= -1122.110505  
th enthalpy= -1122.109561  
free energy= -1122.178895
